# Supplementary material for: A generalised ecohydrological landscape classification for assessing ecosystem risk in Australia due to an altering water regime
Source: Copernicus journal article supplement (doi:10.5194/hess-2022-408), 2023-02-21
Supplement: Supplementary file [file hess-2022-408-RC1-supplement.pdf]

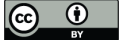

1 **A generalised ecohydrological landscape classification for**  
2 **assessing ecosystem risk in Australia due to an altering water**  
3 **regime**

4 Alexander Herr<sup>1</sup>, Linda E. Merrin<sup>1</sup>, Patrick J. Mitchell<sup>1</sup>, Anthony P. O’Grady<sup>1</sup>, Kate L.  
5 Holland<sup>1</sup>, Richard E. Mount<sup>2</sup>, David A. Post<sup>1</sup>, Chris R. Pavey<sup>1</sup>, Ashley D. Sparrow<sup>1,3</sup>

6 <sup>1</sup> Commonwealth Scientific and Industrial Research Organisation, Australia

7 <sup>2</sup> formerly at: Bureau of Meteorology, Australia

8 <sup>3</sup> Arthur Rylah Institute, Melbourne, Australia

9 *Correspondence to:* Dr Alexander Herr, email: alexander.herr@csiro.au

10 **Abstract**

11 Describing and classifying a landscape for environmental impact and risk assessment purposes is a non-trivial  
12 challenge, as standard landscape classifications that cater for region specific impacts do not exist. Assessing  
13 impacts on ecosystems from extraction of water resources across large regions requires linking of landscape  
14 features to their water requirements. We present the rationale and implementation of an ecohydrological  
15 classification for regions where coal mine and coal seam gas developments may impact on water. Our  
16 classification provides the essential framework for modelling the potential impact of hydrological changes from  
17 future coal resource developments at the landscape level.

18 We develop an attribute-based system that provides representations of the ecohydrological entities and their  
19 connection to landscape features and make use of existing broad-level, classification schemes into an attribute-  
20 based system. We incorporate a rule-set with prioritisation, which underpin risk modelling and make the scheme  
21 resource efficient, where spatial landscape or ecosystem classification schemes, developed for other purposes,  
22 already exist.

23 A consistent rule-set and conceptualised landscape processes and functions allow combining diverse data with  
24 existing classification schemes. This makes the classification transparent, repeatable, and adjustable, should new  
25 data become available. We apply the approach in three geographically different regions, with widely disparate  
26 information sources for the classification and provide a detailed example of its application. We propose that it is  
27 widely applicable around the world for linking ecohydrology to environmental impacts.

28 **Keywords:** Typology, ecology, hydrology, causal pathway, bioregional assessments, environmental impact, risk  
29 analysis

30 **Introduction**

31 The categorisation of the Earth’s surface into geo-ecological landscape classes provides a way to simplify the  
32 complexity of form and function of the landscape and provides vital contextual information to support land and  
33 water management, and policy initiatives. This includes identifying geographical regions within which landscape-

This page contains no comments



34 scale attributes, such as climate, topography, geology, and land cover, that are homogeneous and distinctive  
35 compared to other regions, and involves identifying broad-scale, general patterns, processes, and functions.  
36 Landscape class units are ‘ecologically equivalent’, having the same dominant processes that sustain a similar  
37 suite of species, and are likely to respond in similar ways to management initiatives or environmental changes.  
38 This ecological equivalence enables the selection of assessment locations for monitoring, measurement or  
39 experimentation, and it enables the extrapolation of results to all areas within the same ecological class (Hawkins  
40 and Norris, 2000; MacMillan et al., 2003; Cullum et al., 2016a; Cullum et al., 2016b).

41 Such a landscape classification also explains variation in ecological characteristics (e.g. assemblage structure) and  
42 is predictive of the ecological attributes of those areas. This predictive quality is useful for defining ecological  
43 criteria, identifying reference and degraded sites, defining conservation goals, including the assessment of  
44 biodiversity, and the setting of restoration objectives (Hawkins et al., 2000; McMahon et al., 2001; Snelder et al.,  
45 2004).

46 In summary, landscape classification is a way of dividing a landscape into components where the characteristics  
47 within the components are more similar than the characteristics between the components. That is, the components  
48 have their own distinct features that separate them from the other components.

49 However, describing and classifying a landscape for environmental impact and risk assessment purposes is a non-  
50 trivial challenge, where hydrological records are limited (see e.g. Wolfe et al., 2019). This is the case for many  
51 regions in Australia, where low population densities, high urbanisation and limits in (water) resource management  
52 information exist. For our purpose, which was the assessment of risk to ecosystems within the regions of the  
53 Bioregional Assessments Programme (Bioregional Assessments, 2018), we needed a landscape classification that  
54 reflected the hydrological connectivity of surface and groundwater with ecosystems in the landscape. The  
55 Bioregional Assessment Programme, an Australian regional scale impact assessment, investigated the impacts  
56 and risks of coal seam gas (CSG) and large coal mining developments on water resources and water-dependent  
57 assets via a water pathway (Bioregional Assessments, 2018).

58 In our case, the broad scale assessments of impacts from resource developments on ecosystems required an  
59 understanding of landscape composition and structure, and how these relate to the ecosystems embedded in the  
60 landscape. The type and composition of the landscape components are dependent on the focus of the assessment  
61 and therefore require careful consideration of the questions the assessment seeks to answer (Wiens and Milne,  
62 1989; Eigenbrot, 2016). For Australia, there are several landscape level classifications available (see e.g.  
63 Thackway and Cresswell, 1995; Pain et al., 2011; Hall et al., 2015; NVIS Technological Working Group, 2017;  
64 Gharari et al., 2011). Unfortunately, these available classifications are not directly applicable for our assessment  
65 regions because there is no alignment between the regions and existing classification boundaries, or the  
66 classifications, even if they include ecohydrological elements, are limited to their locations or domain of interest.

67 Identifying the water dependency of landscape components is a prerequisite when analysing the potential impacts  
68 of proposed coal and gas resource developments on water resources at a regional scale. For example, coal resource  
69 developments generally need to manage both groundwater and surface water as part of their operations. With  
70 multiple developments within the one region, impacts are likely to go beyond the local scale and affect ecosystems

This page contains no comments





71 at the landscape level (see for example Bioregional Assessments, 2018, 2019). In this context, there is a need for  
72 an ecological classification of the landscape that identifies and causally connects the water dependency of its  
73 components to activities of resource extraction, in a spatially explicit manner. Further, there is a need to identify  
74 impact pathways between resource extraction sites and the ecosystems that show causal connectivity between  
75 extraction activities and ecosystem impacts.

76 Land classification systems reveal patterns and underlying drivers of ecosystem structure and function, or produce  
77 a tractable unit of assessment for evaluating environmental change (Hobbs and McIntyre, 2005; Poff et al., 2010).  
78 Many different classification approaches and methodologies currently exist to represent ecosystems in a  
79 landscape. This includes the interim bioregional classification for Australia (IBRA), which provides the basis for  
80 defining and managing the national reserve system and; the national vegetation information systems (NVIS) that  
81 describes the extent and distribution of vegetation ecosystems for the Australian continent (Thackway and  
82 Cresswell, 1995; Department of Agriculture, 2021). Classifications addressing hydrology in Australia incorporate  
83 a framework for river management that delineate boundaries between homogenous landscape components, based  
84 on either their dependency on surface or groundwater regimes (Poff et al., 2010; Aquatic Ecosystems Task Group,  
85 2012; Olden et al., 2012). However, none of these classifications describe ecohydrological connections between  
86 waters and the wider landscape. For example, IBRA and NVIS are based purely on vegetation classifications and  
87 so do not contain any hydrological details, while the available hydrological classifications focus purely on the  
88 streams and waterbodies within the landscape, as their focus is on aquatic organisms and environmental flows.  
89 Therefore, a standardised approach to formulating classifications that combine these two aspects, ecosystems and  
90 their water sources, is lacking. The conundrum exists because different analysis contexts require classifications  
91 for different purposes, ranging from conservation planning, habitat mapping, resource assessment and vegetation  
92 modelling, and because there is contention between the generality of broad classifications and their applicability  
93 at the local scale (Leathwick et al., 2003; Abella et al., 2003; Poulter et al., 2011; Cullum et al., 2016b; Pyne et  
94 al., 2017). Hence, we needed a new classification system, when evaluating water dependency in the context of  
95 regional scale for multiple resource developments. This new system must incorporate surface water and  
96 groundwater regimes into a spatial demarcation of ecosystem boundaries in the landscape.

97 With this context in mind, the objectives for this paper are to:

- 98 1. characterise a regional level landscape based on patterns in land use, ecology, geomorphology and hydrology,
- 99 2. develop landscape classes of water-dependent, remnant and human-modified features, and
- 100 3. ensure landscape classes sit within a common framework that aids in formulating conceptual models and  
101 patterns of water dependency across the landscape.

102 Here, we present the rationale, formulation, and implementation of an ecohydrological landscape classification.  
103 Based on a generalised conceptual model of the typical hydrological connectivity within landscape features in a  
104 region, the classification integrates pre-existing, broad-level classification schemes into an attribute-based schema  
105 applied at the regional scale. It places the landscape classification within a common framework that aids in  
106 formulating conceptual models and patterns in water dependency across the landscape. This makes our approach  
107 generally applicable for assessments aimed at regional hydrological impacts and risks to ecosystems. Importantly,  
108 the classification also provides the ability to conceptually describe and causally connect hydrological changes at

- 
- T** Number: 1 Author: rver4657 Subject: Highlight Date: 9/04/2023 12:04:12 PM  
These are quite complex statements and I think a more detailed example would be useful. Why are aquatic organisms and environmental flows not useful indicators for "waters and the wider landscape". This might be crystal clear to you, but is not intuitive. This is a major part of your argument.
- 
- T** Number: 2 Author: rver4657 Subject: Highlight Date: 9/04/2023 12:07:13 PM  
This is again a very dense conceptual statement and it would be worth explaining this in more detail. What do you mean by "surface water and groundwater regimes"? And why do they need to be incorporated into the "spatial demarcation"? How does this relate to catchments/watersheds?
- 
- T** Number: 3 Author: rver4657 Subject: Highlight Date: 9/04/2023 12:08:04 PM  
and testing?
- 
- T** Number: 4 Author: rver4657 Subject: Highlight Date: 9/04/2023 12:08:39 PM  
and test?
-

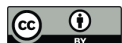

109 the landscape level with impacts on ecological entities within the landscape. These causal pathways are the basis  
110 for spatially identifying the impacted areas, and for developing an appropriate mitigation response, including for  
111 extractive resource developments and water extraction.

112 We have applied this approach to several regions across eastern Australia with coal and CSG resource  
113 developments. Here we will focus on its application in three regions; Namoi, Maranoa–Balonne–Condamine and  
114 Galilee, and subsequently discuss why the approach is transferable to other regional developments that may carry  
115 a hydrological risk, even those in a different contextual setting with regards to data sources and existing landscape  
116 classifications.

## 117 **Methods**

118 In the following section, we show the development of a dataset-agnostic method to develop a regional-level  
119 landscape classification that is flexible in incorporating data sources at different scales, including region-specific  
120 datasets.

## 121 **Study areas**

122 Our three study areas are the Namoi, the Maranoa–Balonne–Condamine and the Galilee regions in eastern  
123 Australia. Each of these regions have coal resource developments within them and have distinctly different  
124 landscape characteristics. They cover different state jurisdictions, or even cross state jurisdictions, and range from  
125 approximately 36,000 km<sup>2</sup> to 600,000 km<sup>2</sup> in size. Consequently, the classification is based on different state-  
126 based datasets. Each region's classification relies on the extent of groundwater and surface water systems that  
127 existing and potential future coal resource developments in the region may impact.

## 128 **Namoi region**

129 The Namoi region covers approximately 35,700 km<sup>2</sup> in eastern Australia, is located within New South Wales and  
130 forms one catchment of the Murray–Darling Basin. The long-term mean annual rainfall varies from 600 to 1100  
131 mm and potential evapotranspiration (PET) varies from 1200 to 1400 mm. It contains six operational coal mines  
132 (one underground mine and five open-cut mines), nine potential future coal mines and one potential CSG  
133 development. The nine potential future coal mines consist of two underground, one combined open cut and  
134 underground, and seven open cut mines. The region covers most of the Namoi River catchment, with the Namoi  
135 River being the main river within the region. It also contains two major aquifer systems – the Namoi Alluvial  
136 aquifer and the Pilliga Sandstone aquifer (Figure 1a).

137 The main land use within the region is agriculture; both dryland and irrigated cropping, and livestock grazing, as  
138 well as forestry. There is also a diverse range of landscapes and ecosystems within the region, including the  
139 Liverpool and Kaputar ranges, the Liverpool Plains floodplains, and Darling Riverine plains in the west of the  
140 region, open box woodlands on the slopes, and temperate and sub-alpine forests in the east of the region. A range  
141 of aquatic habitats occur downstream of Narrabri, with large areas of anabranches and billabong wetlands. The  
142 Pilliga Nature Reserve in the upper catchment of Bohena Creek, together with The Pilliga State Forest, form the

This page contains no comments



143 largest remaining area of dry sclerophyll forest west of the Great Diving Range in New South Wales (Welsh et  
144 al., 2014).

#### 145 **Galilee region**

146 The Galilee region covers approximately 612,300 km<sup>2</sup> and is located mostly within Queensland, Australia. PET  
147 far exceeds rainfall, particularly in the summer months. Yearly rainfall ranges from 300 to 700 mm and PET from  
148 2200 to 2900 mm. There are 17 proposed coal resource developments in the Galilee region. These include three  
149 open-cut coal mines, two underground coal mines, five combined open-cut and underground coal mines, four coal  
150 mines of currently unknown type, and three CSG projects (Figure 1b).

151 The Galilee region includes the headwaters of seven major drainage catchments. These catchments are Bulloo,  
152 Burdekin, Cooper Creek, Diamantina, Flinders, Paroo and Warrego. The largest of these catchments within the  
153 region are the Cooper Creek and Diamantina. Groundwater within the region is a very important resource, as most  
154 of the streams are ephemeral. Groundwater is used for town water, agriculture and industry. Most groundwater in  
155 the region is extracted from the Great Artesian Basin (Figure 1b).

156 The region covers a range of environments, including mountains of the Great Dividing Range in the east, through  
157 to semi-arid and arid areas in the central and western part of the region. The main land use in the region is livestock  
158 grazing on native vegetation. There is no intensive agriculture in the region, and a low human population density,  
159 largely due to low and unpredictable rainfall (Evans et al., 2014).

#### 160 **Maranoa–Balonne–Condamine region**

161 The Maranoa–Balonne–Condamine region covers approximately 130,000 km<sup>2</sup> and is located mostly within south-  
162 east Queensland with about half the area within the Murray-Darling Basin. From east to west, average annual  
163 rainfall decreases from 800 mm to 420 mm, as PET increases from 1500 to 2370 mm. The region overlies the  
164 Surat Basin and has five open-cut coal mines and five CSG projects, as well as two proposed open-cut coal mines  
165 (Figure 1c).

166 The region contains the headwaters of the Condamine-Balonne, Moonie, Weir, Maranoa and Dawson rivers. Most  
167 of the rivers within the region are ephemeral. Groundwater is therefore an important water source and is used for  
168 stock and domestic purposes, and in some cases, town water supply. The Great Artesian Basin is the main source  
169 of groundwater used within the region (Welsh et al., 2015).

170 The main land use within the region is grazing on natural vegetation, with dryland cropping and production  
171 forestry also major land uses. The main vegetation type within the region is grassy woodlands, with river red  
172 gums, coolabah and river oak common riparian species. There are also six wetlands of national significance within  
173 the region: Balonne River Floodplain, Boggomoss Springs, Dalrymple and Blackfellow Creeks, Lake Broadwater,  
174 Palm Tree and Robinson Creeks, and The Gums Lagoon (Welsh et al., 2015).

175

This page contains no comments

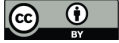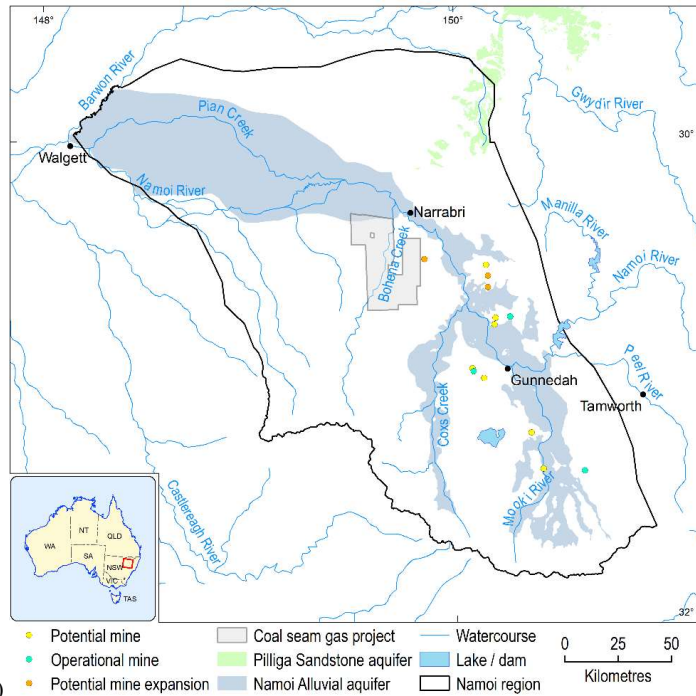

176 (a)

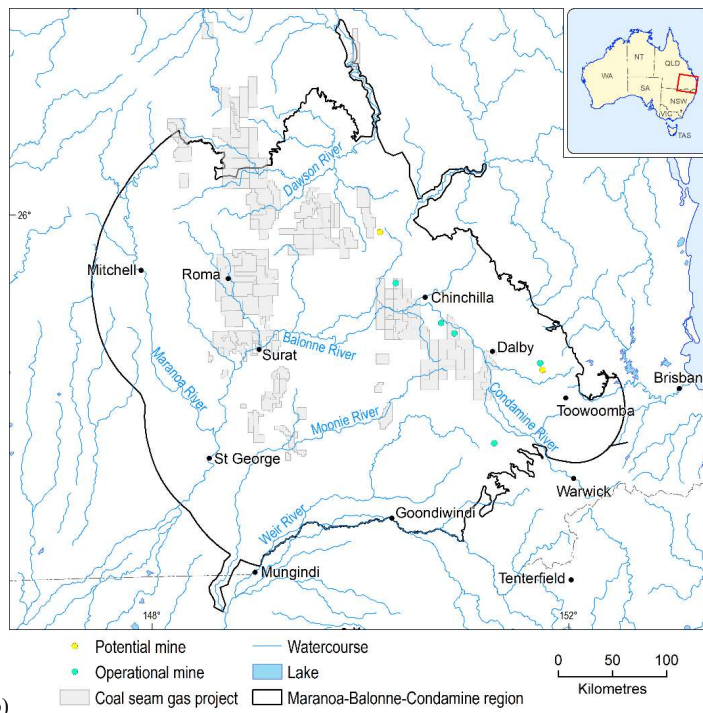

177 (b)

178 **Figure 1. Study areas for (a) the Namoi region (b) the Galilee region and (c) the Maranoa–Balonne–Condamine region,**  
 179 **showing the potential coal resource development sites**

This page contains no comments



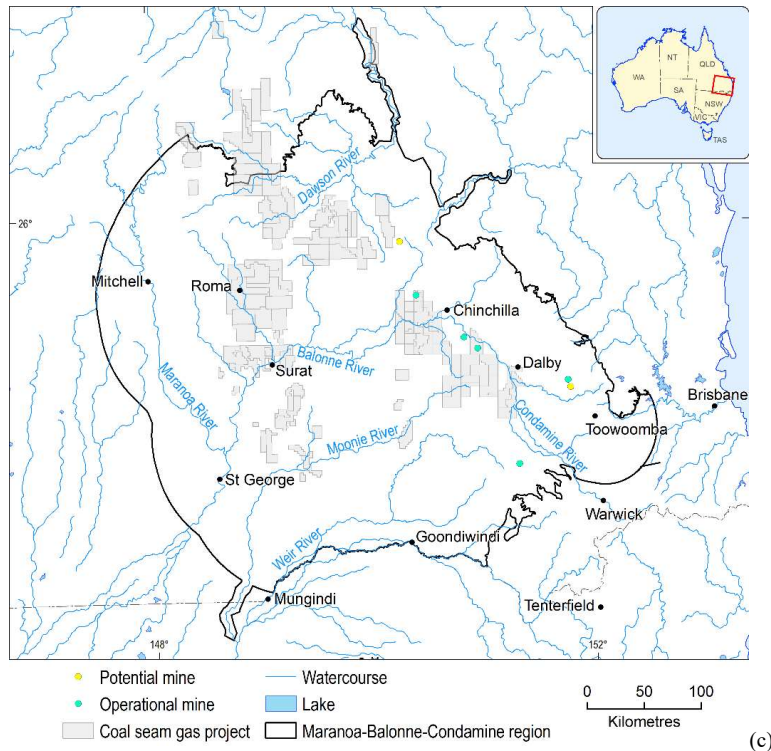

Figure 1 (cont). Study areas for (c) the Maranoa–Balonne–Condamine region, showing the potential coal resource development sites

### Landscape classification development – overview and rationale

The purpose of this ecohydrological landscape classification is to characterise the landscape based on patterns in land use, ecology, geomorphology and hydrology, and from these, develop landscape classes of water-dependent, remnant and human-modified features. Existing spatial data for each region forms the basis for categorising the landscape features using a rule-set based on attribute features within the spatial datasets. Depending on their origin and original purpose, the datasets have a regional, state or national coverage. This feature-based classification helps to place the landscape classes within a common biophysical system that aids in formulating conceptual models and patterns in water dependency across the landscape of each region. This provides a classification that is aligned with the idiosyncrasies of each region. Maintaining regionality is essential when developing conceptual models and quantitative models for assessing the risk to ecological components from hydrological changes. For example, arid and semi-arid regions have very different ecological environments, functions and processes than subtropical or temperate woodlands.

Our approach uses a defined rule-set and priorities, which we apply to regionally available data sets to achieve a landscape classification for each of our regions. This is different to most other landscape classifications that may use climate, topography, hydrological assessment units and, remote sensing data and apply statistical dimensionality reduction and classifications such as proximity analysis (see e.g. Gharari et al., 2011; Leibowitz et al., 2014; Sawicz et al., 2014; Zhang et al., 2016; Addicott et al., 2021; Carlier et al., 2021; Jones et al., 2021).

 Number: 1 Author: rver4657 Subject: Highlight Date: 9/04/2023 12:38:38 PM  
Figure 1 b is missing? and Figure 1C is in twice?

---

 Number: 2 Author: rver4657 Subject: Highlight Date: 9/04/2023 12:57:32 PM  
What is the reason for choosing these three classes? I think this needs to be clarified. Why would these be "distinct" in the landscape and why are they important or relevant?

---

 Number: 3 Author: rver4657 Subject: Inserted Text Date: 9/04/2023 1:09:43 PM

---



200 When considering the characteristics of our regions, the following features form part of the broad rule-set for  
201 defining landscape classes:

- 202 • broad habitat/land use type (remnant/human-modified).  
203 Note: In the Australian context, remnant vegetation are areas of natural vegetation that did not experience  
204 significant human modification.
- 205 • wetland (wetland/non-wetland)
- 206 • topography (upland/lowland, floodplain/non-floodplain)
- 207 • groundwater (groundwater-dependent, Great Artesian Basin (GAB)/non-GAB)/non-groundwater  
208 dependent).  
209 Note: identifies groundwater dependency and classifies this with Great Artesian basin groundwaters.
- 210 • vegetation type (riparian/woodland floodplain/grassy woodland/rainforest)
- 211 • water regime (permanent/ephemeral/null) of surface water

212 These features identify groups of land forms and use, streams and springs.

213

214 For our work, where hydrological connectivity is the main reason for developing a new classification, the most  
215 important characteristics are the hydrological features. We developed a hierarchical approach, where hydrological  
216 features have priority over other landscape characteristics. This resulted in a spatially complete landscape  
217 classification. The method of prioritisation depended on region-specific characteristics and the data availability.  
218 An example prioritisation assigned in order of highest to lowest is:

- 219 • aquatic ecosystems (e.g. wetlands, streams and lakes)
- 220 • remnant vegetation – areas of vegetation that contain relatively intact plant communities
- 221 • other landscape components that are ‘non-remnant vegetation’ and are typically ‘human-modified’.

222

223 Subsequent use of the landscape classification for risk identification with expert input also required combining  
224 landscape classes into broader landscape groups. These landscape groups provided efficiencies in the expert  
225 elicitation process, as they combined more similar ecological system components based on our landscape classes  
226 while also accounting for region specific differences.

### 227 Land form classification

228 Land form classification relied on the dominant land type of either habitat or land use (remnant/human-modified)  
229 to determine landscapes that are relatively natural and those that have been ‘human-modified’. Relatively intact  
230 areas are more likely to contain ecological assets such as species and ecological communities, than highly  
231 modified areas. Location within the region (topography–upland/lowland, floodplain/non–floodplain),  
232 groundwater dependency and water regime, were part of classifying the landscape. Determining areas that are  
233 subjected to flooding, or that have persistent water, assists in identifying landscapes that support water-dependent  
234 habitat and vegetation, and aquatic ecosystems (Table 1).

- 
- T** Number: 1 Author: rver4657 Subject: Highlight Date: 9/04/2023 2:31:32 PM  
Where does these originate from. Why were these exactly chosen? For example, why just upland/lowland? Basically all these are qualitative choices, probably linked to your final map that you would like. Therefore this should be clarified. Unless these classifications have no influence on the framework development.
- 
- T** Number: 2 Author: rver4657 Subject: Highlight Date: 9/04/2023 2:32:28 PM  
Can you explain this more? Why specifically is hydrological connectivity the main reason, and how do you define "hydrological connectivity"
- 
- T** Number: 3 Author: rver4657 Subject: Highlight Date: 9/04/2023 2:33:23 PM  
This needs some evidence to support why this qualitative choice is important
- 
- T** Number: 4 Author: rver4657 Subject: Highlight Date: 9/04/2023 2:33:52 PM  
Can you explain what you mean by "spatially complete"?
- 
- T** Number: 5 Author: rver4657 Subject: Highlight Date: 9/04/2023 2:39:27 PM  
I am assuming you will explain this further
- 
- T** Number: 6 Author: rver4657 Subject: Highlight Date: 9/04/2023 2:40:27 PM  
What is "dominant": > 50%? And what is the uncertainty around this?



235 **Stream classification**

236 **Stream classification in each of the study regions was based on stream position within the catchment, water regime**  
237 **(perennial/near permanent or ephemeral/temporary) and dependence and source of groundwater (Table 2).**  
238 Catchment position is a potential indicator of stream morphology and flow patterns, while water regime is  
239 important when considering habitat suitability and physical processes within the channel and riparian zone.  
240 Streams can also gain and lose water to local and regional groundwater systems, interacting with groundwater-  
241 dependent ecosystems (Table 2).

242 **Spring classification**

243 The water source is the basis of spring classification. **The source of groundwater** is important when considering  
244 regional scale landscape classifications, due to the hydrological connectivity of aquifers and potential coal  
245 resource developments (Table 3).

---

 Number: 1 Author: rver4657 Subject: Highlight Date: 9/04/2023 3:10:37 PM

I am unsure how this actually worked? did you look at long term data? Or was this simply determined from the existing classifications? What do you exactly mean by "stream position"?

 Number: 2 Author: rver4657 Subject: Highlight Date: 9/04/2023 3:11:32 PM

So this is again simply based on the original data.



246 **Table 1. Land form classification criteria and example datasets**

| Characteristic   | Classification                                                                                                             | Example datasets                                                                                                                                                                           |
|------------------|----------------------------------------------------------------------------------------------------------------------------|--------------------------------------------------------------------------------------------------------------------------------------------------------------------------------------------|
| Habitat/land use | <ul style="list-style-type: none"> <li>• Non-remnant</li> <li>• Remnant</li> </ul>                                         | Australian land use mapping (Australian Bureau of Agricultural and Resource Economics and Sciences, 2014) (national)                                                                       |
|                  |                                                                                                                            | NSW regional vegetation (NSW Office of Environment and Heritage, 2015) (regional)                                                                                                          |
| Topography       | <ul style="list-style-type: none"> <li>• Floodplain</li> <li>• Non-floodplain</li> </ul>                                   | NSW regional vegetation (NSW Office of Environment and Heritage, 2015) (regional)                                                                                                          |
|                  |                                                                                                                            | Namoi Valley Flood Plain Atlas 1979 (NSW Office of Environment and Heritage, 1979) (regional)                                                                                              |
|                  |                                                                                                                            | Murray-Darling Basin aquatic ecosystem classification (Department of Sustainability, Environment, Water, Population and Communities, 2014) (regional)                                      |
|                  |                                                                                                                            | GEODATA TOPO 250K Series 3 (Geoscience Australia, 2006) (national)                                                                                                                         |
| Groundwater      | <ul style="list-style-type: none"> <li>• Groundwater dependent (source)</li> <li>• Non-groundwater dependent</li> </ul>    | Namoi groundwater dependent ecosystems (NSW Office of Water, 2015) (regional)                                                                                                              |
|                  |                                                                                                                            | Queensland Groundwater Dependent Ecosystems and Shallowest Watertable Aquifer (Queensland Herbarium, Department of Science, Information Technology, Innovation and the Arts, 2015) (state) |
|                  |                                                                                                                            | Queensland Groundwater Dependent Ecosystems (Queensland Department of Science, Information Technology, Innovation and the Arts, 2013) (state)                                              |
| Water regime     | <ul style="list-style-type: none"> <li>• Temporary</li> <li>• Near-permanent</li> <li>• Fresh</li> <li>• Saline</li> </ul> | Queensland wetland data version 3 - wetland areas (Queensland Department of Science, Information Technology, Innovation and the Arts, 2012) (state)                                        |
|                  |                                                                                                                            | Queensland wetland data version 3 - wetland areas (Queensland Department of Science, Information Technology, Innovation and the Arts, 2012) (state)                                        |
|                  |                                                                                                                            | Queensland Groundwater Dependent Ecosystems and Shallowest Watertable Aquifer (Queensland Herbarium, Department of Science, Information Technology, Innovation and the Arts, 2015) (state) |
|                  |                                                                                                                            | South Australian Wetlands – Groundwater Dependent Ecosystems (GDE) Classification (Sa Department for Water, 2010) (state)                                                                  |
| Vegetation       | <ul style="list-style-type: none"> <li>• Broad vegetation type</li> </ul>                                                  | NSW regional vegetation (NSW Office of Environment and Heritage, 2015) (regional)                                                                                                          |

247

NSW = New South Wales

This page contains no comments



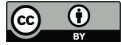

248 **Table 2. Stream classification criteria and example datasets**

| Characteristic | Classification                   | Example datasets                                                                                                                                                                           |
|----------------|----------------------------------|--------------------------------------------------------------------------------------------------------------------------------------------------------------------------------------------|
| Topography     | • Upland                         | Murray-Darling Basin aquatic ecosystem classification (Department of Sustainability, Environment, Water, Population and Communities, 2014) (regional)                                      |
|                | • Lowland                        | NSW regional vegetation (NSW Office of Environment and Heritage, 2015) (regional)                                                                                                          |
|                |                                  | MrVBF (Csiro, 2000) (national)                                                                                                                                                             |
| Groundwater    | • Groundwater dependent (source) | Asset database for the Namoi subregion (Bioregional Assessment Programme, 2016) (regional)                                                                                                 |
|                | • Non-groundwater dependent      | Queensland Groundwater Dependent Ecosystems and Shallowest Watertable Aquifer (Queensland Herbarium, Department of Science, Information Technology, Innovation and the Arts, 2015) (state) |
| Water regime   | • Perennial                      | Queensland groundwater dependent ecosystems (Queensland Department of Science, Information Technology, Innovation and the Arts, 2013) (state)                                              |
|                | • Ephemeral                      | Murray-Darling Basin aquatic ecosystem classification (Department of Sustainability, Environment, Water, Population and Communities, 2014) (regional)                                      |
|                |                                  | Geofabric Surface Cartography (Bureau of Meteorology, 2012) (national)                                                                                                                     |

249

250 **Table 3. Spring classification criteria and example datasets**

| Characteristic | Classification                   | Example datasets                                                                                                                    |
|----------------|----------------------------------|-------------------------------------------------------------------------------------------------------------------------------------|
| Groundwater    | • Groundwater dependent (source) | Asset database for the Namoi subregion (Bioregional Assessment Programme, 2016) (regional)                                          |
|                | • Non-groundwater dependent      | Asset database for the Maranoa–Balonne–Condamine subregion (Bioregional Assessment Programme, 2015) (regional)                      |
|                |                                  | Spring vents assessed for the Surat Underground Water Impact Report 2012 (Office of Groundwater Impact Assessment, 2015) (regional) |

251

## 252 **Results**

253 Below we present the resulting landscape classes for the three regions. For each region, we also combined the  
 254 landscape classes into groups (landscape groups) to gain efficiencies in a subsequent expert elicitation process.  
 255 These groups were specific to the region and were based on distinctions in their topography, their water  
 256 dependency and association with GAB or non-GAB GDEs, floodplain/non-floodplain or upland/lowland  
 257 environments and remnant/human-modified habitat types. GDEs and remnant/human-modified habitat types. The  
 258 purpose of the landscape groups was to combine non-water dependent landscape classes and relate water  
 259 dependent landscape classes to region specific aspects of their water dependency, which enabled conceptualisation  
 260 of the landscape for modelling purposes. While the approach in defining the landscape classes is based on a

 Number: 1 Author: rver4657 Subject: Highlight Date: 9/04/2023 3:12:19 PM

I am unclear the methodology. Are we simply talking about GIS overlays? Or is there actually some sort of decision making?

---

 Number: 2 Author: rver4657 Subject: Highlight Date: 9/04/2023 3:16:29 PM

How? Please indicate the rules, as this needs to be reproducible

---

 Number: 3 Author: rver4657 Subject: Highlight Date: 9/04/2023 3:17:05 PM

Please specify, again, reproducibility is important



261 **Consistent rule set and prioritisation**, each of the regions has different landscape classes, which is a consequence  
262 of the differences in location, jurisdictions and available spatially explicit data.

### 263 **Landscape classes in the Namoi region**

264 There were 29 landscape classes within six landscape groups in the Namoi region (Figure 2). Of these landscape  
265 groups, 'human-modified' (non-remnant) was the largest (59.3%; Table 4), and included land uses such as urban,  
266 agriculture, plantations and other intensive land uses. The dryland remnant vegetation was the second largest  
267 landscape group and consisted of the grassy woodland landscape class (24.2%; Table 4). This landscape class was  
268 considered non-water dependent as **it did not intersect** with floodplain, wetland or GDE features. The rainforest  
269 landscape group was the smallest (0.5%; Table 4), with only a limited distribution (Figure 3a).

270 The stream network consisted of two landscape groups (floodplain or lowland riverine and non-floodplain or  
271 upland riverine). The non-floodplain or upland riverine landscape group had a larger proportion of stream network  
272 length (63.8%) compared to the floodplain or lowland riverine landscape group (36.2%; Figure 3b). There were  
273 **22 springs identified within** the Namoi region, with seven of these associated with the GAB (Figure 3b).

 Number: 1 Author: rver4657 Subject: Highlight Date: 9/04/2023 3:17:53 PM  
Please outline this consistent rule set and prioritisation

---

 Number: 2 Author: rver4657 Subject: Highlight Date: 9/04/2023 3:18:34 PM  
So this was simply a GIS operation?

---

 Number: 3 Author: rver4657 Subject: Highlight Date: 9/04/2023 3:19:14 PM  
In the original data?

---

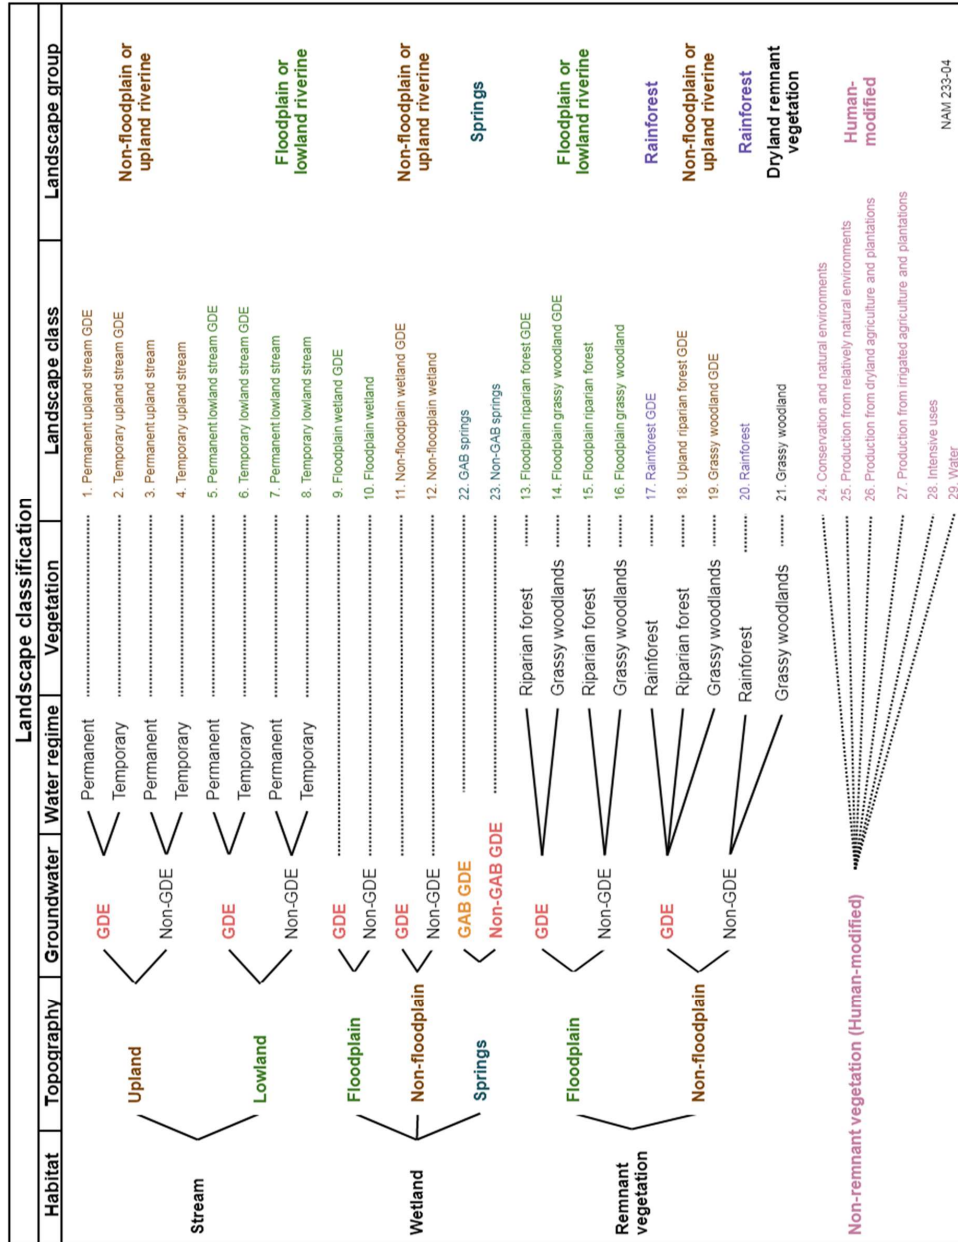

274

275 Figure 2. Overview of the Namoi landscape classification schema, including criteria and attributes resulting in six  
 276 landscape groups

---

Number: 1 Author: rver4657 Subject: Highlight Date: 9/04/2023 3:20:06 PM

I can't really see the "criteria", what makes something an "upland" topography compared to a "lowland" topography?



277 **Table 4. Percentage of area of each landscape group for the Namoi region**

| Landscape group                   | Percentage of region (%) | Number of classes | Landscape classification attributes                                                                                                                                                                                                                    |
|-----------------------------------|--------------------------|-------------------|--------------------------------------------------------------------------------------------------------------------------------------------------------------------------------------------------------------------------------------------------------|
| Human-modified                    | 59.3%                    | 6                 | Conservation of natural environments, production from relatively natural environments, production from dryland agriculture and plantations, production from irrigated agriculture and plantations, intensive uses or waters for production/consumption |
| Dryland remnant vegetation        | 24.2%                    | 1                 | Non-floodplain, non-GDE, grassy woodland remnant vegetation                                                                                                                                                                                            |
| Non-floodplain or upland riverine | 9.8%                     | 8                 | Upland or non-floodplain streams, wetlands or remnant vegetation                                                                                                                                                                                       |
| Floodplain or lowland riverine    | 6.2%                     | 10                | Lowland or floodplain streams, wetlands or remnant vegetation                                                                                                                                                                                          |
| Rainforest                        | 0.5%                     | 2                 | Non-floodplain GDE or non-GDE rainforest remnant vegetation                                                                                                                                                                                            |
| Springs                           | <0.1%                    | 2                 | GAB or non-GAB springs                                                                                                                                                                                                                                 |

278

This page contains no comments



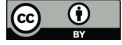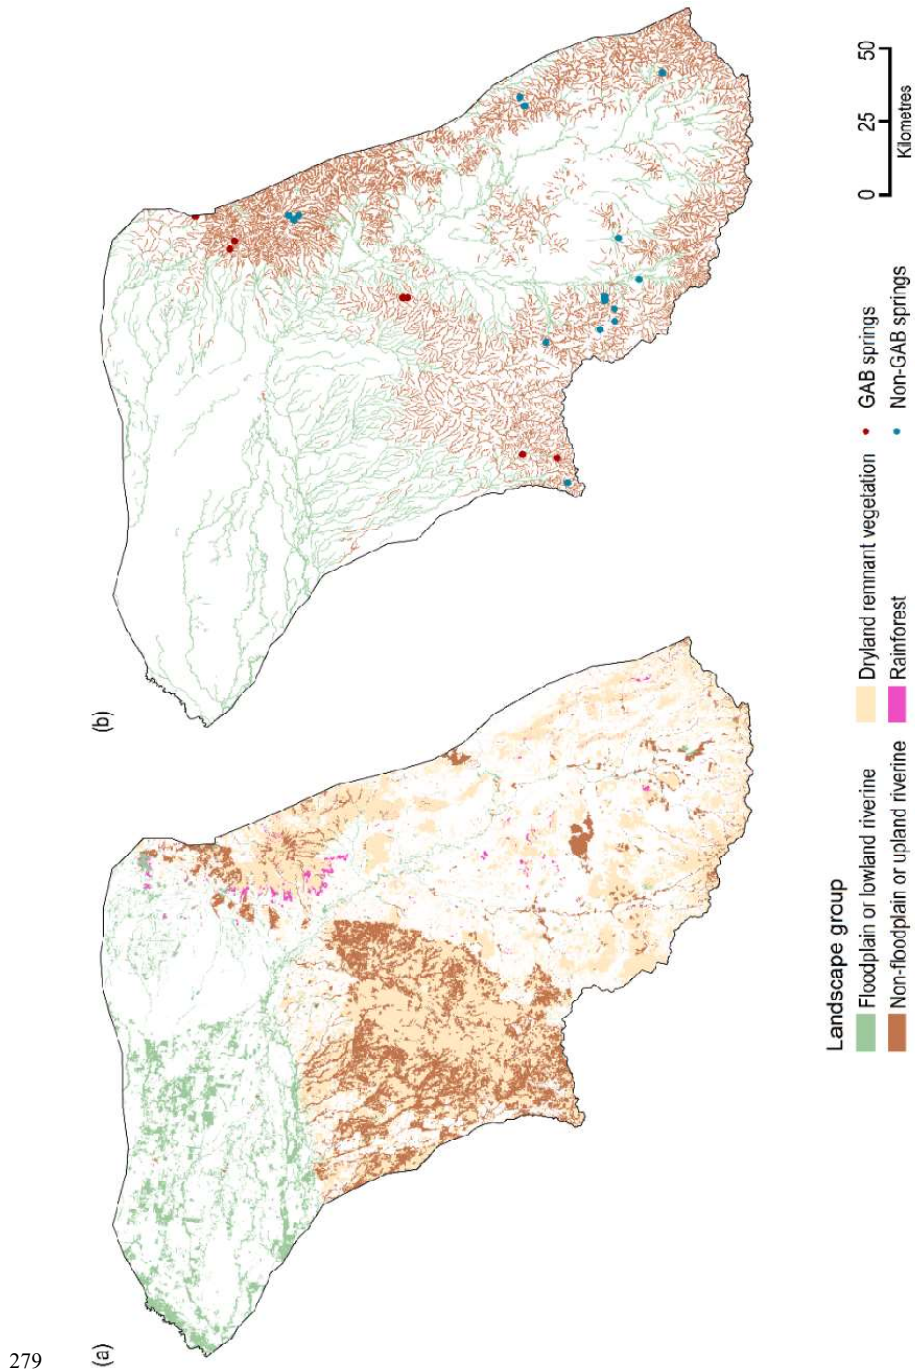

280 Figure 3. (a) Landscape groups (excluding the 'Human-modified'), and (b) Stream network classified as 'upland' or  
281 'lowland' in the landscape classification and 'Springs' within the Namoi region. GAB = Great Artesian Basin  
282 Data: Bureau of Meteorology (2012); Bioregional Assessment Programme (2017)

This page contains no comments



283 **Landscape classes in the Galilee region**

284 The Galilee region has 31 landscape classes organised into 11 landscape groups (Figure 4). The dryland landscape  
285 group was the largest group within the region and the only group to have no water dependency (68.5%; Table 5).  
286 The landscape groups that covered the floodplain areas were the next most dominant classes, with floodplain,  
287 terrestrial GDE (12.94%; Table 5) and floodplain, non-wetland (11.8%; Table 5). The remaining three non-  
288 floodplain landscape groups consisted of disconnected wetlands, and terrestrial and wetland GDEs (4.9%  
289 combined; Table 5).

290 The stream network was classified as groundwater dependent or non-groundwater dependent. Most of the streams  
291 in the region were non-GDEs (87.7% compared to 12.3% for the streams, GDE landscape group). There were also  
292 over 3000 springs in the region.

This page contains no comments



293

294

|                       |             | Landscape classification |                |                        |                                                                |                                      | Landscape group |
|-----------------------|-------------|--------------------------|----------------|------------------------|----------------------------------------------------------------|--------------------------------------|-----------------|
| Topography            | Wetland     | Groundwater              | Water regime   | Vegetation             | Landscape class                                                | Landscape group                      |                 |
| <b>Vegetation</b>     |             |                          |                | Remnant vegetation     | Wetland GDE, remnant vegetation                                | Floodplain, wetland GDE              |                 |
|                       |             |                          |                | Non-remnant vegetation | Wetland GDE                                                    |                                      |                 |
|                       | Wetland     | GDE                      | Saline         | Remnant vegetation     | Floodplain disconnected saline wetland, remnant vegetation     | Floodplain, disconnected wetland     |                 |
|                       |             | Disconnected             |                | Non-remnant vegetation | Floodplain disconnected saline wetland                         |                                      |                 |
|                       | Non-wetland | GDE                      | Non-saline     | Remnant vegetation     | Floodplain disconnected wetland, remnant vegetation            |                                      |                 |
|                       |             | Disconnected             |                | Non-remnant vegetation | Floodplain disconnected wetland                                |                                      |                 |
|                       |             |                          |                | Remnant vegetation     | Terrestrial GDE, remnant vegetation                            | Floodplain, terrestrial GDE          |                 |
|                       |             |                          |                | Non-remnant vegetation | Terrestrial GDE                                                |                                      |                 |
|                       |             |                          |                | Remnant vegetation     | Floodplain disconnected non-wetland, remnant vegetation        | Floodplain, non-wetland              |                 |
|                       |             |                          |                | Non-remnant vegetation | Floodplain disconnected non-wetland                            |                                      |                 |
|                       | Wetland     | GDE                      | Saline         | Remnant vegetation     | Non-floodplain wetland GDE, remnant vegetation                 | Non-floodplain, wetland GDE          |                 |
|                       |             | Disconnected             |                | Non-remnant vegetation | Non-floodplain wetland GDE                                     |                                      |                 |
|                       | Non-wetland | GDE                      | Non-saline     | Remnant vegetation     | Non-floodplain disconnected saline wetland, remnant vegetation | Non-floodplain, disconnected wetland |                 |
|                       |             | Disconnected             |                | Non-remnant vegetation | Non-floodplain disconnected saline wetland                     |                                      |                 |
|                       |             |                          |                | Remnant vegetation     | Non-floodplain disconnected wetland, remnant vegetation        |                                      |                 |
|                       |             |                          |                | Non-remnant vegetation | Non-floodplain disconnected wetland                            |                                      |                 |
|                       |             |                          |                | Remnant vegetation     | Non-floodplain terrestrial GDE, remnant vegetation             | Non-floodplain, terrestrial GDE      |                 |
|                       |             |                          |                | Non-remnant vegetation | Non-floodplain terrestrial GDE                                 |                                      |                 |
|                       |             |                          |                | Remnant vegetation     | Dryland, remnant vegetation                                    | Dryland                              |                 |
|                       |             |                          |                | Non-remnant vegetation | Dryland                                                        |                                      |                 |
| <b>Stream network</b> |             |                          |                | .....                  | .....                                                          |                                      |                 |
|                       |             |                          | Temporary      | .....                  | Temporary upland GDE stream                                    | Streams, GDE                         |                 |
|                       |             |                          | Near-permanent | .....                  | Near-permanent upland GDE stream                               |                                      |                 |
| Upland                |             | GDE                      | Temporary      | .....                  | Temporary upland stream                                        | Streams, non-GDE                     |                 |
|                       |             | Disconnected             | Near-permanent | .....                  | Near-permanent upland stream                                   |                                      |                 |
|                       |             |                          | Temporary      | .....                  | Temporary lowland GDE stream                                   | Streams, GDE                         |                 |
|                       |             | GDE                      | Near-permanent | .....                  | Near-permanent lowland GDE stream                              |                                      |                 |
| Lowland               |             | Disconnected             | Temporary      | .....                  | Temporary lowland stream                                       |                                      |                 |
|                       |             |                          | Near-permanent | .....                  | Near-permanent lowland stream                                  |                                      |                 |
|                       |             |                          | Temporary      | .....                  | Temporary estuarine stream                                     | Streams, non-GDE                     |                 |
|                       |             |                          | Near-permanent | .....                  | Near-permanent estuarine stream                                |                                      |                 |
| Estuarine             |             |                          |                | .....                  |                                                                |                                      |                 |
| <b>Springs</b>        |             |                          |                | .....                  | Springs                                                        | Springs                              |                 |
|                       |             | GDE                      |                | .....                  |                                                                |                                      |                 |

GAL-340-001

Figure 4. Landscape classification of the Galilee region

This page contains no comments



295

296 **Table 5. Percentage of area of each landscape group for the Galilee region**

| Landscape group                     | Percentage of region (%) | Number of classes | Landscape classification attributes                                                            |
|-------------------------------------|--------------------------|-------------------|------------------------------------------------------------------------------------------------|
| Dryland                             | 68.5%                    | 2                 | Non-floodplain, non-wetland, disconnected and saline remnant or non-remnant vegetation         |
| Floodplain, terrestrial GDE         | 12.9%                    | 2                 | Floodplain, non-wetland and GDE remnant or non-remnant vegetation                              |
| Floodplain, non-wetland             | 11.8%                    | 2                 | Floodplain, non-wetland, disconnected and non-saline remnant or non-remnant vegetation         |
| Floodplain, disconnected wetland    | 1.1%                     | 4                 | Floodplain, wetland, disconnected saline and non-saline remnant or non-remnant vegetation      |
| Floodplain, wetland GDE             | 0.8%                     | 2                 | Floodplain, wetland and GDE remnant or non-remnant vegetation                                  |
| Non-floodplain, terrestrial GDE     | 3.4%                     | 2                 | Non-floodplain, non-wetland and GDE remnant or non-remnant vegetation                          |
| Non-floodplain disconnected wetland | 1.4%                     | 4                 | Non-floodplain, wetland, disconnected, saline and non-saline remnant or non-remnant vegetation |
| Non-floodplain, wetland GDE         | <0.1%                    | 2                 | Non-floodplain, wetland and GDE remnant or non-remnant vegetation                              |
| Springs                             | <0.1%                    | 1                 | GDE springs                                                                                    |

297

298 **Landscape classes in the Maranoa–Balonne–Condamine region**

299 The landscape classification for the Maranoa–Balonne–Condamine resulted in 34 landscape classes within five  
 300 landscape groups (Figure 5). The largest landscape group was the human-modified group (72.2%, Table 6), which  
 301 included agricultural production, plantations and other intensive land uses. Of the remaining landscape groups,  
 302 dryland remnant vegetation was the second most dominant (19.8%, Table 6). It was not considered water  
 303 dependent, because it did not intersect with floodplain, wetland or GDE features.

304 There are three landscape groups that cover the stream network. The most dominant landscape group is floodplain  
 305 or lowland riverine (including non-GAB GDEs) (47.8%), followed by non-floodplain or upland riverine  
 306 (including non-GAB GDEs) (39.4%) and GAB GDEs (riverine, springs, floodplain or non-floodplain) (12.7%).  
 307 There were 177 springs identified within the region. Most of the springs were GAB GDEs (riverine, springs,  
 308 floodplain or non-floodplain) (86.4%, compared to 13.6% for non-floodplain or upland riverine (including non-  
 309 GAB GDEs)).

This page contains no comments



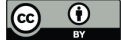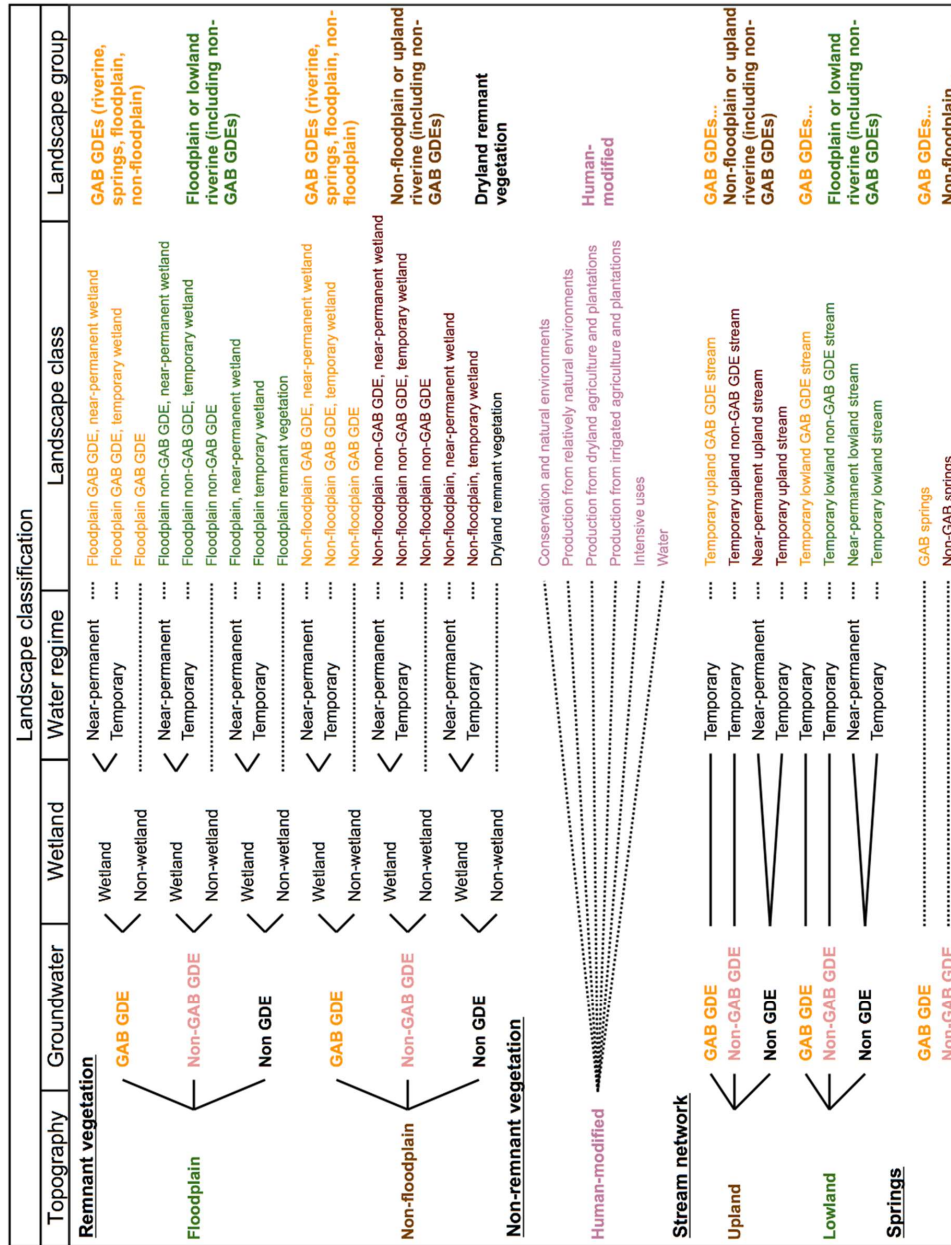

MBC-233-012

310  
 311 Figure 5. Landscape classification of the Maranoa–Balonne–Condamine region  
 312 GAB = Great Artesian Basin, GDE = groundwater-dependent ecosystem, GAB GDEs... = GAB GDEs (riverine,  
 313 springs, floodplain, non-floodplain), Non-floodplain... = Non-floodplain or upland riverine (including or non-GAB  
 314 GDEs)

This page contains no comments



315 **Table 6. Percentage of area of each landscape group for the Maranoa–Balonne–Condamine region**

| Landscape group                                            | Percentage of region (%) | Number of classes | Landscape classification attributes                                                                                                                                                                                                                    |
|------------------------------------------------------------|--------------------------|-------------------|--------------------------------------------------------------------------------------------------------------------------------------------------------------------------------------------------------------------------------------------------------|
| Human-modified                                             | 72.2%                    | 6                 | Conservation of natural environments, production from relatively natural environments, production from dryland agriculture and plantations, production from irrigated agriculture and plantations, intensive uses or waters for production/consumption |
| Dryland remnant vegetation                                 | 19.8%                    | 1                 | Non-floodplain, non-GDE, non-wetland remnant vegetation                                                                                                                                                                                                |
| Floodplain or lowland riverine (including non-GAB GDEs)    | 4.5%                     | 9                 | Floodplain or lowland, non-GAB GDE or non-GDE, temporary or near-permanent wetland, non-wetland or stream                                                                                                                                              |
| Non-floodplain or upland (including non-GAB GDEs)          | 2.2%                     | 9                 | Non-floodplain or upland, non-GAB GDE or non-GDE, temporary or near-permanent wetland, non-wetland, stream or spring                                                                                                                                   |
| GAB GDEs (riverine, springs, floodplain or non-floodplain) | 1.3%                     | 9                 | Floodplain, non-floodplain or upland GAB-GDE, temporary or near-permanent wetland, non-wetland, stream or spring                                                                                                                                       |

316 GAB = Great Artesian Basin, GDE = groundwater-dependent ecosystem

### 317 **Discussion**

318 In Australia, there is no consistent national classification that links ecosystems at landscape level with their  
319 underlying hydrological system. While there are many different land classifications that incorporate hydrological  
320 aspects, they do not provide linkages between hydrology and landscape elements that enable a broad scale  
321 ecological assessment of impacts associated with changes in water flow and availability, and they are not  
322 sufficiently generic for the purpose of assessing landscape level water related impacts on ecosystems in a spatially  
323 explicit manner (Kilroy et al., 2008; Elmore et al., 2003; Brown et al., 2014; Liermann et al., 2012; Doody et al.,  
324 2017; Poff et al., 2010; Aquatic Ecosystems Task Group, 2012; Olden et al., 2012; Gharari et al., 2011). However,  
325 the bioregional assessment program needed to assess impacts of coal resource extraction on ecological systems  
326 via a water pathway. Hence, we needed to develop an ecological landscape classification for this purpose that  
327 could service the different regions of the assessment.

328 While our spatially explicit landscape classification provided experts with the ability to readily identify cause and  
329 effect relationships between landscape elements and landscape hydrology, there are obvious differences between  
330 the landscape classifications in the three regions (See Figure 2, Figure 4 and Figure 5) and this is a reflection of  
331 the locations and geographical differences of the regions. It provides the specificity that is required in a regional  
332 impact assessment, where the boundaries are based on a combination of geology, water resources and  
333 administrative conditions. The regionality also means that there is need for different data sets describing the  
334 landscape features that would not be available from a classification covering the whole of Australia.

335 Nevertheless, each landscape classification provides a typology with an explicit connection of water to the  
336 landscape class. This connection enables a causal linkage between hydrological change in one part of the

**T** Number: 1 Author: rver4657 Subject: Highlight Date: 9/04/2023 3:24:56 PM  
Can you explain why exactly your classification system does provide this?

---

**T** Number: 2 Author: rver4657 Subject: Highlight Date: 9/04/2023 3:32:56 PM  
It is not clear to me how this impact was included, what specific criteria were used to identify this impact?

---

**T** Number: 3 Author: rver4657 Subject: Highlight Date: 9/04/2023 3:33:28 PM  
how exactly?

---

**T** Number: 4 Author: rver4657 Subject: Highlight Date: 9/04/2023 3:34:07 PM  
Please indicate examples of these differences and how this reflects the region?

---



337 landscape and impact to ecosystems represented by landscape classes. The causal linkage is dependent on (i) a  
338 spatially explicit connection between water in the landscape and the landscape classes, (ii) conceptual  
339 understanding how changes in water may result in a reaction of specific ecosystem elements in the landscape class  
340 and/or landscape group and (iii) a way of modelling quantitative changes in ecosystem elements related to changes  
341 in water. Our ecohydrological classification approach for landscapes provides this spatially explicit connection  
342 and has implicit ecohydrological elements that foster the conceptual understanding of the causal linkage. For  
343 example, spatially modelling groundwater level drawdown enables a prediction on which landscape elements  
344 classified as springs may be experiencing impacts from water extraction and, with additional ecological modelling,  
345 by how much and when.

346 Subsequent ecological modelling using expert elicitation of potential impacts drew heavily on our classification,  
347 which is based on a consistent rule-set and fosters conceptual understanding of landscape processes and functions.  
348 It provides an essential framework for experts to understand and conceptualise how modelled future hydrological  
349 changes from coal resource developments link to potential ecological changes at the landscape level. It allows the  
350 incorporation of different data sources and existing classification schemes. This consistency also makes the  
351 classification development transparent, repeatable, and adjustable, should new data become available.

352 In the remainder of this section we show an application of the approach in more detail to substantiate our claim  
353 for the general useability of our classification approach in water mitigated regional impact assessment of human  
354 developments.

### 355 **Landscape classification based impact assessment**

356 The purpose of developing the landscape classification was to assess the risk of coal resource development on the  
357 ecology of a region via a water pathway. Details of the predicted changes in groundwater and surface water for  
358 the Namoi and Galilee regions are in Post et al. (2020). Here, we demonstrate the assessment of potential  
359 ecological impacts using the Namoi region. For full details of the analyses in each of the three regions see Holland  
360 et al. (2017); Herr et al. (2018b); and Lewis et al. (2018). This work included expert assessment of ecological risk  
361 to ecosystem components based on conceptual models. Hence, the models needed to identify water mitigated  
362 linkages between hydrological changes, ecosystem components and the landscape classes. This occurred in a 3  
363 step process.

364 In the following we briefly explain the 3 step process to illustrate the utility of our landscape classification  
365 approach for assessing the risk to ecosystems in the landscape groups. The process included experts identifying  
366 risk to landscape classes using their knowledge on local ecosystems. Specifically, the experts used the broad  
367 landscape groups and their underlying hydrogeological features to develop qualitative models initially that then  
368 fed into building quantitative models. These models assessed the future hydrological changes and risks to the  
369 ecosystems in the landscape groups.

370 The detailed 3 step process included:

371 **Step 1:** Develop qualitative models to conceptualise and prioritise ecosystem components of the landscape class  
372 and their linkage to hydrological variables.

-  Number: 1 Author: rver4657 Subject: Highlight Date: 9/04/2023 3:35:49 PM  
How is this causal linkage tested? It is one thing to link these things, but what is this based on? Or how can this be proven that this actually reflects what is in the landscape and plausible conceptually

---
-  Number: 2 Author: rver4657 Subject: Highlight Date: 9/04/2023 3:37:05 PM  
Are there published results from this? Where is this modelling?

---
-  Number: 3 Author: rver4657 Subject: Highlight Date: 9/04/2023 3:37:30 PM  
What demonstrates that this is an "essential" framework

---
-  Number: 4 Author: rver4657 Subject: Highlight Date: 9/04/2023 3:51:24 PM  
I think a solid concise summary of the main findings of these earlier papers should be included here.

---
-  Number: 5 Author: rver4657 Subject: Highlight Date: 9/04/2023 3:52:01 PM  
I assume you will explain how they did this?

---



73 Here we use the example of the upland riverine landscape class. A qualitative model for the upland riverine  
74 landscape class agreed with the existing understanding that a reduction in overbank flows and lowering of the  
75 water table resulted in a reduction in several ecosystem components including riparian habitat, amphibians and  
76 fish, and an increase in fine particulate matter, dissolved organic matter and cyanobacteria (Holland et al., 2017;  
77 Herr et al., 2018b; Hosack et al., 2018). A qualitative model has at its basis the conceptual understanding of  
78 ecosystem components and the direction of their interactions, that is positive, negative or neutral influence of one  
79 component on another. This understanding also incorporates feedback loops between the ecosystem components  
80 in form of digraphs and it enables to direct time intensive quantitative model development to variables with the  
81 highest importance. The method is based on a matrix level analysis of the component interactions (see for example  
82 Herr et al., 2016; Ickowicz et al., 2018).

83 The hydrological variables, and relationships between ecosystem components that the qualitative modelling  
84 process prioritised for upland riverine systems were the macroinvertebrate responses to riverine system change,  
85 presence of tadpoles and changes in projected foliage cover in the riparian trees along the stream channel (Table  
86 7).

87 **Step 2:** Use qualitative model priorities to develop quantitative models.

88 In this context, qualitative models highlighted critical relationships and variables that became the focus of the  
89 quantitative models (see for example Herr et al., 2016; Hosack et al., 2018; Ickowicz et al., 2018). This process  
90 helped to focus on those critical ecosystem components that were important quantitative models for an impact and  
91 risk assessment of landscape classes. The focus of the quantitative models was on 3 elements within the upland  
92 riverine landscape classes (Table 7): (i) the response of upland riparian trees to changes in groundwater; (ii)  
93 macroinvertebrate assemblage changes related to days with no consecutive water (zero-flow days) and the longest  
94 zero flow event period; and (iii) the response of tadpoles to zero flow days and longest zero flow event period.  
95 Specific details of the variable definitions are in Ickowicz et al. (2018).

396

 Number: 1 Author: rver4657 Subject: Highlight Date: 9/04/2023 3:53:17 PM  
OK, is this because the conceptual model is based on the earlier studies or has this been developed independently?

---

 Number: 2 Author: rver4657 Subject: Highlight Date: 9/04/2023 3:53:36 PM  
Where is this shown? Or explained?

---

 Number: 3 Author: rver4657 Subject: Highlight Date: 9/04/2023 7:41:44 PM  
More detail and a short summary will strengthen the explanation

---





397

398 **Table 7: Upland riverine ecosystem quantitative modelling variables that experts prioritised in the qualitative model**  
 399 **and associated ecological and hydrological variables used in the development of the quantitative impact model (after**  
 400 **Ickowicz et al., 2018)**

| Expert prioritised relationship                                                                              | Ecological variable (with associated sample units)                                                                                                                                                                                                                                  | Hydrological variable                                                                                                                                                                                                                                                                                                           |
|--------------------------------------------------------------------------------------------------------------|-------------------------------------------------------------------------------------------------------------------------------------------------------------------------------------------------------------------------------------------------------------------------------------|---------------------------------------------------------------------------------------------------------------------------------------------------------------------------------------------------------------------------------------------------------------------------------------------------------------------------------|
| Response of the upland riparian forest to changes in hydrological regime and groundwater                     | Annual mean projected foliage cover of species group that includes: Casuarina, yellow box, Blakely's red gum, <i>Acacia salicina</i> , <i>Angophora floribunda</i> , grey box. Transect of 50 m length and 20 m width that extends from first bench ('toe') on both sides of stream | <ul style="list-style-type: none"> <li>• The mean annual number of events with a peak daily flow exceeding the overbank flow events.</li> <li>• Maximum difference in drawdown under a baseline and under the expected drawdown</li> <li>• The year with the maximum difference in drawdown relative to the baseline</li> </ul> |
| Response of fast-water macroinvertebrates to changes in number of zero-flow days and maximum zero-flow event | Average number of families of aquatic macroinvertebrates in riffle habitat sampled using the NSW AUSRIVAS method for riffles                                                                                                                                                        | <ul style="list-style-type: none"> <li>• The number of zero-flow days per year, averaged over a 30-year period.</li> <li>• The maximum length of spells (in days per year) with zero flow, averaged over a 30-year period.</li> </ul>                                                                                           |
| Response of tadpoles to changes in number of zero-flow days and maximum zero-flow event                      | Probability of presence of tadpoles from <i>Limnodynastes</i> genus (species <i>dumerilii</i> , <i>salmi</i> , <i>interioris</i> and <i>terraereginae</i> ) sampled using standard 30 cm dip net                                                                                    | <ul style="list-style-type: none"> <li>• The number of zero-flow days per year, averaged over a 30-year period.</li> <li>• The maximum length of spells (in days per year) with zero low, averaged over a 30-year period.</li> </ul>                                                                                            |

401

This page contains no comments



402 **Step 3:** Identify risk areas in the regions where quantitative modelling indicated significant changes to landscape  
403 group components.

404 This quantitative modelling approach incorporated expert elicitation in a Bayesian framework to predict changes  
405 in ecological system components because of expected changes in hydrology conditions. The method dealt with  
406 complexity and limited knowledge that allows for updating with new information, which is an important feature  
407 in evidence-based decision making (see for example Hosack et al., 2017).

408 The modelling of risk to ecosystems at regional scale focuses on recognising which parts of the region are  
409 potentially impacted and which parts are unlikely to experience harm. Using our landscape classification as a  
410 crucial input, the modelling delineated impacted areas within each region, based on a zone of potential  
411 hydrological change. This is the area in the landscape, where hydrological modelling identified an expected  
412 change to surface and groundwater from future resource extraction. Risk levels across a landscape group are a  
413 result of aggregating individual risks associated with each ecological variable and categorising the risks into three  
414 levels based on their percentile spreads (for details see Herr et al., 2018b).

415 For the Namoi subregion, for example, dryland remnant vegetation, human-modified ecosystems, no-floodplain  
416 and upland riverine ecosystems and rainforests, will not experience impacts, while floodplain and lowland  
417 ecosystems area and streams of floodplain and lowland ecosystems will potentially experience impacts (Herr et  
418 al., 2018a). Figure 6 (a) shows the landscape groups that are at risk of impact from hydrological changes as they  
419 are situated within the zone of potential hydrological change, and Figure 6 (b) shows the risk level to these  
420 landscape groups from the quantitative models. Note that there is a category “Remaining unquantified ‘floodplain  
421 and lowland riverine’ classes”. The expert could not develop quantitative models for these classes, because there  
422 was no surface water hydrological model available that could predict changes to surface water flows. This was  
423 related to the lack of gauging data and groundwater interaction details specific to the lowland drainage channels.  
424 Having lowland riverine classes whose risk remains unquantified means there is additional work needed before  
425 an assessment and potential mitigation of impacts from hydrological changes is possible (Herr et al., 2018b).

426

 Number: 1 Author: rver4657 Subject: Highlight Date: 9/04/2023 7:43:19 PM

And the methodology and results of this are where in the paper? Otherwise a summary is needed to help the reader. It also would assist with reproducibility

 Number: 2 Author: rver4657 Subject: Highlight Date: 9/04/2023 8:04:58 PM

How? Can you please outline this in more detail?

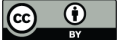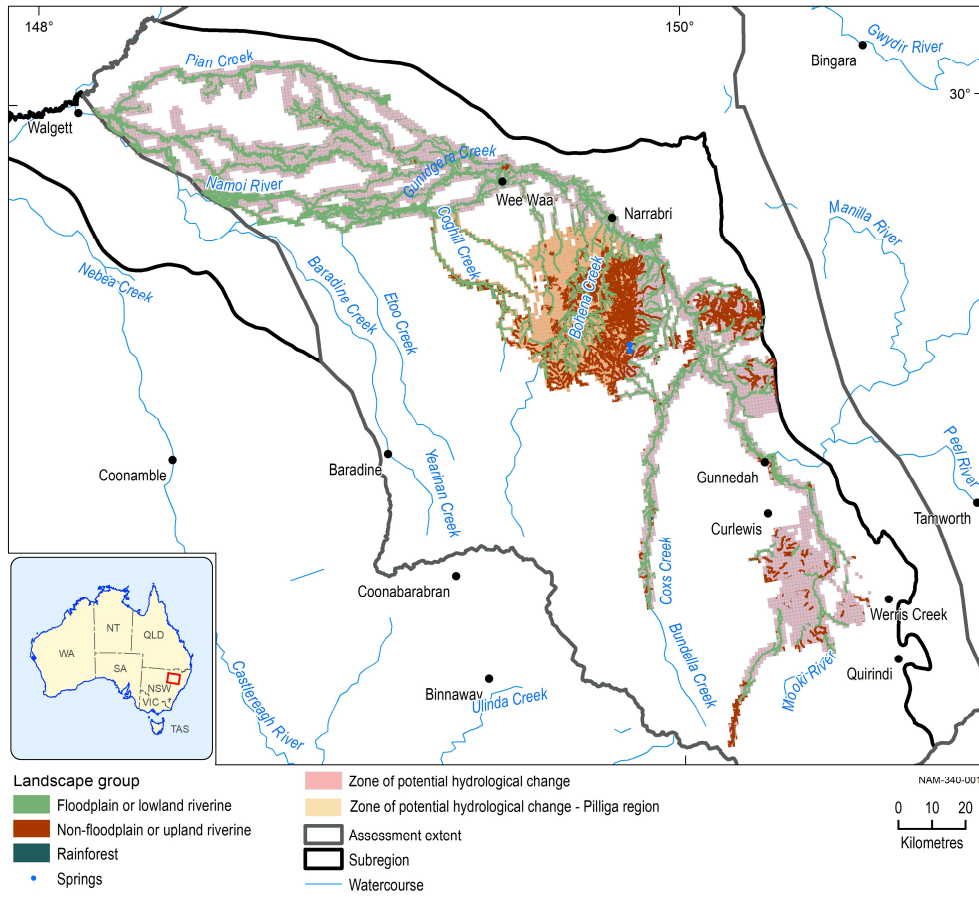

427

428 **Figure 6a: Landscape classes overlaying areas of potential hydrological change (Herr et al., 2018b)**

This page contains no comments



429

430

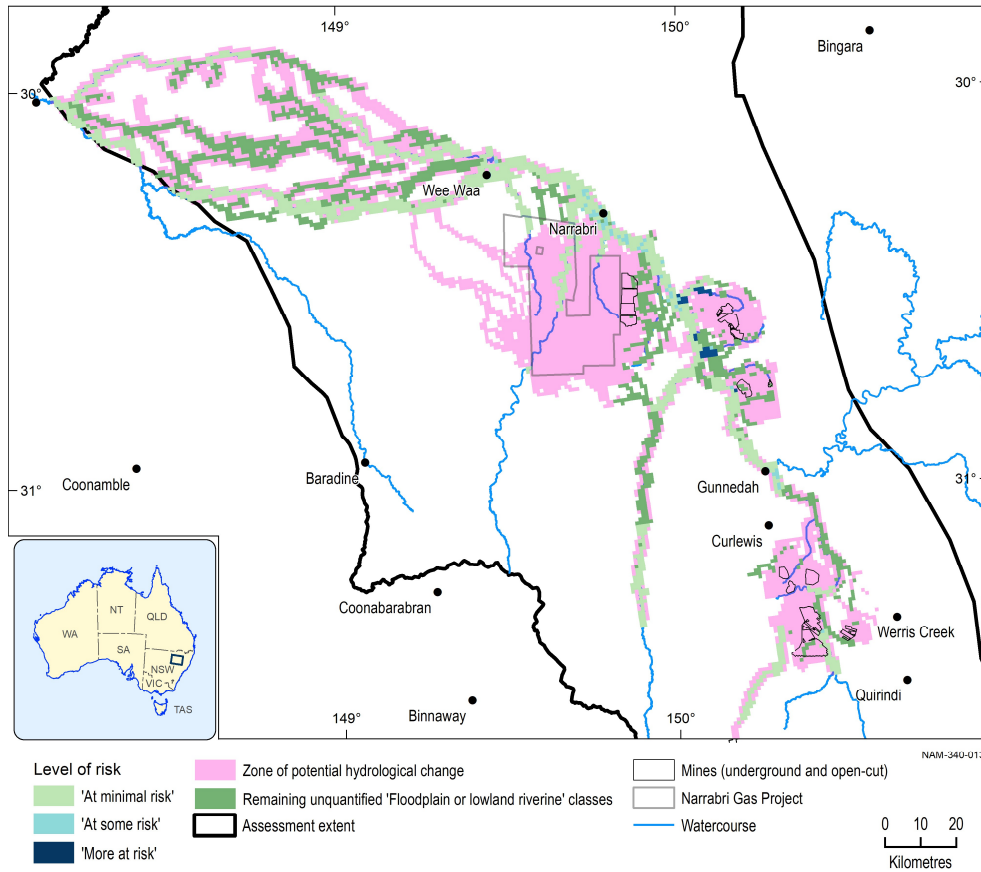

431

432

433 **Figure 6b: Hydrological change risk level of lowland landscape class areas (Herr et al., 2018b)**

This page contains no comments





434 **Limitations**

435 While the ecohydrological landscape classification approach provided the basis for the risk assessment outlined  
436 above, there are some limitations that require consideration when attempting to develop and apply this  
437 ecohydrological landscape classification approach.

438 An important issue for the landscape classification is formulating a typology that adequately reflects both the  
439 functional and structural complexity of the ecosystem, while delivering a succinct and consistent representation  
440 of the system that is ‘fit for purpose’ to assign hydrological connectivity between the landscape classes, and within  
441 the general landscape. The systematic classification imposes discrete boundaries among landscape components  
442 that may not adequately capture gradients within and across landscape classes. This approach tends to simplify  
443 important components of ecotones such as ‘transition’ zones or edges between landscape classes, where ecosystem  
444 processes and/or biodiversity are likely to peak. If landscape classes are treated purely as ‘closed’ ecosystems,  
445 then the result may be a poor representation of the biotic interactions and energy exchange between adjacent  
446 systems, and this could limit a conventional impact and risk analyses. These conceptual challenges may be  
447 important considerations for subsequent impact assessments, requiring special attention in assigning risk from  
448 human induced changes in hydrology. However, conceptual modelling of impacts may be able to compensate for  
449 this shortfall, when for example, incorporating riparian areas within riverine and wetland model development.

450 **There are also spatial data issues that require additional consideration beyond just simply incorporating existing**  
451 **data. There are several technical issues that constitute important gaps in the landscape classification for the Namoi**  
452 **region, for example. Here two different approaches to define GDEs were required because one spatial dataset only**  
453 **included terrestrial vegetation and not riverine systems mapped within the stream network (NSW Office of Water,**  
454 **2015). A second GDE dataset helped overcome this deficiency, and provided the basis to classify the stream**  
455 **network’s dependency on groundwater (Bioregional Assessment Programme, 2012).**

456 Wetlands in large areas of Australia are not yet adequately mapped. The separation between groundwater-  
457 dependent and surface water-dependent wetlands may not always be accurate. **In many areas there is little**  
458 **knowledge of groundwater – surface water interactions. There is also a significant gap in the understanding of**  
459 **water thresholds for ecosystems associated with springs. In part, this results from a lack of bores to provide**  
460 **meaningful groundwater data. Some examples of these data gaps appear in the discussion of the functioning of**  
461 **springs in the Doongmabulla Springs complex in the Galilee region, particularly in identifying the source aquifer**  
462 **(Fensham et al., 2016).**

463 There is extensive work from Queensland that links regional ecosystems vegetation to their groundwater needs,  
464 although the mapped areas are still small (Sattler and Williams, 1999; Queensland Government, Queensland,  
465 2016; Queensland Herbarium, 2021). However, in many parts of Australia, GDE mapping and classification  
466 approaches are limited, and many areas lack systematic ground-truthing. This is especially true in areas with  
467 extensive intact native vegetation remnants, such as the Pilliga Forest of the Namoi region, where large areas of  
468 ‘Grass woodland GDE’ landscape class exist, but the lack of published studies on vegetation–groundwater  
469 interactions limits a definition of the nature of this interaction.

 Number: 1 Author: rver4657 Subject: Highlight Date: 9/04/2023 8:07:36 PM  
Also, where all the spatial datasets at the same resolution?

---

 Number: 2 Author: rver4657 Subject: Highlight Date: 9/04/2023 8:08:52 PM  
This questions the value of the final map? If the original data is questionable, how can the combined modelling be correct?



## 470 Conclusions

471 We showed that our approach works in the three geographically different regions, with widely disparate  
472 information sources that feed into the landscape classification. This also makes the approach resource efficient  
473 where existing spatial landscape or ecosystem classification schemes, developed for other purposes, can be  
474 incorporated into the classification.

475 The study was able to formulate and implement an attribute-based classification scheme to define and delineate  
476 water-dependent features across three large regions. We conclude that this approach allowed us to repurpose  
477 several existing schemas into an adaptable and practical typology of a landscape classification. The conceptual  
478 framework of landscape ecohydrology forms the basis for this classification, which is used to focus subsequent  
479 analysis of potential cumulative impacts on water resources from multiple coal resource developments. The  
480 classification enabled the development of specific conceptual and qualitative models that linked changes in  
481 hydrology to potential impacts on ecosystems using the landscape classes. The classification provided crucial  
482 inputs for a risk analysis of landscape components subjected to hydrological changes.

483 Applying our approach to different regions showed that it is sufficiently general and flexible to enable the  
484 development of ecohydrological classifications in regions in Australia and potentially globally, given a  
485 sufficiently mature information base and data availability.

## 486 References

487 Abella, S. R., Shelburne, V. B., and MacDonald, N. W.: Multifactor classification of forest landscape ecosystems  
488 of Jocassee Gorges, southern Appalachian Mountains, South Carolina, *Can J For Res*, 33, 1933-1946,  
489 <https://doi.org/10.1139/x03-116>, 2003.

490 Addicott, E., Neldner, V. J., and Ryan, T.: Aligning quantitative vegetation classification and landscape scale  
491 mapping: updating the classification approach of the Regional Ecosystem classification system used in  
492 Queensland, *Australian Journal of Botany*, 69, 400-413, <https://doi.org/10.1071/BT20108>, 2021.

493 Aquatic Ecosystems Task Group: Aquatic Ecosystems Toolkit. Module 1: Aquatic Ecosystems Toolkit Guidance  
494 Paper., Australian Government Department of Sustainability, Environment, Water, Population and Communities,  
495 Canberra, <https://www.awe.gov.au/water/publications/aquatic-ecosystems-toolkit-module-1-guidance-paper>,  
496 2012.

497 Australian Bureau of Agricultural and Resource Economics and Sciences: Catchment Scale Land Use of Australia  
498 - 2014, Bioregional Assessment Source Dataset. [dataset],  
499 <http://data.bioregionalassessments.gov.au/dataset/6f72f73c-8a61-4ae9-b8b5-3f67ec918826>, 2014.

500 Bioregional Assessment Programme: National Groundwater Dependent Ecosystems (GDE) Atlas, Bioregional  
501 Assessment Derived Dataset [dataset], [http://data.bioregionalassessments.gov.au/dataset/e358e0c8-7b83-4179-  
502 b321-3b4b70df857d](http://data.bioregionalassessments.gov.au/dataset/e358e0c8-7b83-4179-b321-3b4b70df857d), 2012.

503 Bioregional Assessment Programme: Asset database for the Maranoa-Balonne-Condamine subregion on 26 June  
504 2015 [dataset], <http://data.bioregionalassessments.gov.au/dataset/35e95025-f962-4425-83c7-767e2d6722e6>,  
505 2015.

506 Bioregional Assessment Programme: Asset database for the Namoi subregion on 18 February 2016, Bioregional  
507 Assessment Derived Dataset [dataset], [http://data.bioregionalassessments.gov.au/dataset/22061f2c-e86d-4ca8-  
508 9860-c349c2513fd8](http://data.bioregionalassessments.gov.au/dataset/22061f2c-e86d-4ca8-9860-c349c2513fd8), 2016.

This page contains no comments

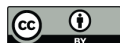

- 509 Bioregional Assessment Programme: Landscape classification of the Namoi preliminary assessment extent.  
510 Bioregional Assessment Derived Dataset. [dataset], <http://data.bioregionalassessments.gov.au/dataset/360c39e5-1225-401d-930b-f5462fdb8005>, 2017.
- 512 Bioregional Assessments: Bioregional Assessment Programme,  
513 <https://www.bioregionalassessments.gov.au/bioregional-assessment-program>, last access: 26/08/2019, 2018.
- 514 Bioregional Assessments: Geological and Bioregional Assessment Program,  
515 <https://www.bioregionalassessments.gov.au/geological-and-bioregional-assessment-program>, last access:  
516 26/08/2019, 2019.
- 517 Brown, S. C., Lester, R. E., Versace, V. L., Fawcett, J., and Laurenson, L.: Hydrologic Landscape Regionalisation  
518 Using Deductive Classification and Random Forests, PLoS ONE, 9,  
519 <https://doi.org/10.1371/journal.pone.0112856>, 2014.
- 520 Bureau of Meteorology: Australian Hydrological Geospatial Fabric ('Geofabric'), version 2.1.1, Canberra,  
521 [http://www.bom.gov.au/water/geofabric/documents/v2\\_1/ahgf\\_dps\\_surface\\_cartography\\_V2\\_1\\_release.pdf](http://www.bom.gov.au/water/geofabric/documents/v2_1/ahgf_dps_surface_cartography_V2_1_release.pdf),  
522 2012.
- 523 Carlier, J., Doyle, M., Finn, J. A., Ó hUallacháin, D., and Moran, J.: A landscape classification map of Ireland  
524 and its potential use in national land use monitoring, Journal of Environmental Management, 289, 112498,  
525 <https://doi.org/10.1016/j.jenvman.2021.112498>, 2021.
- 526 CSIRO: Multi-resolution Valley Bottom Flatness MrVBF at three second resolution CSIRO 20000211 [dataset],  
527 <http://data.bioregionalassessments.gov.au/dataset/7dfc93bb-62f3-40a1-8d39-0c0f27a83cb3>, 2000.
- 528 Cullum, C., Brierley, G., Perry, G., and Witkowski, E.: Landscape archetypes for ecological classification and  
529 mapping: The virtue of vagueness, Prog Phys Geogr, 41, <http://doi.org/10.1177/0309133316671103>, 2016a.
- 530 Cullum, C., Rogers, K. H., Brierley, G., and Witkowski, E. T. F.: Ecological classification and mapping for  
531 landscape management and science, Prog Phys Geogr, 40, 38-65, <https://doi.org/10.1177/0309133315611573>,  
532 2016b.
- 533 Department of Agriculture, W. a. t. E.: National Vegetation Information System (NVIS),  
534 <https://www.awe.gov.au/agriculture-land/land/native-vegetation/national-vegetation-information-system>, last  
535 access: 22 Mar 2022, 2021.
- 536 Department of Sustainability, Environment, Water, Population and Communities: Murray-Darling Basin aquatic  
537 ecosystem classification [dataset], <http://data.bioregionalassessments.gov.au/dataset/a854a25c-8820-455c-9462-8bd39ca8b9d6>, 2014.
- 539 Doody, T. M., Barron, O. V., Dowsley, K., Emelyanova, I., Fawcett, J., Oyerton, I. C., Pritchard, J. L., Van Dijkf,  
540 A. I. J. M., and Warren, G.: Continental mapping of groundwater dependent ecosystems: A methodological  
541 framework to integrate diverse data and expert opinion, Journal of Hydrology-Regional Studies, 10, 61-81,  
542 <https://doi.org/10.1016/j.ejrh.2017.01.003>, 2017.
- 543 Eigenbrot, F.: Redefining Landscape Structure for Ecosystem Services, Current Landscape Ecology Reports, 1,  
544 80-86, <http://doi.org/10.1007/s40823-016-0010-0>, 2016.
- 545 Elmore, A. J., Mustard, J. F., and Manning, S. J.: Regional patterns of plant community response to changes in  
546 water: Owens Valley, California, Ecological Applications, 13, 443-460, [https://doi.org/10.1890/1051-0761\(2003\)013\[0443:RPOPJR\]2.0.CO;2](https://doi.org/10.1890/1051-0761(2003)013[0443:RPOPJR]2.0.CO;2), 2003.
- 548 Evans, T., Tan, K., Magee, J., Karim, F., Sparrow, A., Lewis, S., Marshall, S., Kellett, J., and Galinec, V.: Context  
549 statement for the Galilee subregion. Product 1.1 from the Lake Eyre Basin Bioregional Assessment, Department  
550 of the Environment, Bureau of Meteorology, CSIRO and Geoscience Australia, Australia,  
551 <http://data.bioregionalassessments.gov.au/product/LEB/GAL/1.1>, 2014.
- 552 Fensham, R., Silcock, J., Laffineur, B., and MacDermott, H.: Lake Eyre Basin Springs Assessment Project:  
553 hydrogeology, cultural history and biological values of springs in the Barcaldine, Springvale and Flinders River

This page contains no comments

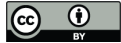

- 554 supergroups, Galilee Basin springs and Tertiary springs of western Queensland. Report to Office of Water  
555 Science, Department of Science, Information Technology and Innovation, Brisbane.,  
556 <https://publications.qld.gov.au/dataset/11c1af89-93b9-497a-b99f-2ec6c7a8d339/resource/c5d1813b-73a4-4e05-aa86-39a8ed3045fb/download/lcbsa-hchb-report-springs-wst-qld.pdf>, 2016.
- 558 Geoscience Australia: GEODATA TOPO 250K Series 3 [dataset],  
559 <http://data.bioregionalassessments.gov.au/dataset/a0650f18-518a-4b99-a553-44f82f28bb5f>, 2006.
- 560 Gharari, S., Hrachowitz, M., Fenicia, F., and Savenije, H. H. G.: Hydrological landscape classification:  
561 investigating the performance of HAND based landscape classifications in a central European meso-scale  
562 catchment, *Hydrol. Earth Syst. Sci.*, 15, 3275-3291, <https://doi.org/10.5194/hess-15-3275-2011>, 2011.
- 563 Hall, J., Storey, D., Piper, V., Bolton, E., Woodford, A., and Jolly, J.: Ecohydrological conceptualisation for the  
564 eastern Pilbara region. A report prepared for BHP Billiton Iron Ore., Subiaco, 240, [https://www.bhp.com/-/media/bhp/regulatory-information-media/iron-ore/western-australia-iron-ore/0000/report-appendices/160316\\_ironore\\_waio\\_pilbarastrategicassessment\\_state\\_appendix7\\_appendixd.pdf](https://www.bhp.com/-/media/bhp/regulatory-information-media/iron-ore/western-australia-iron-ore/0000/report-appendices/160316_ironore_waio_pilbarastrategicassessment_state_appendix7_appendixd.pdf), 2015.
- 567 Hawkins, C. P. and Norris, R. H.: Performance of different landscape classifications for aquatic bioassessments:  
568 introduction to the series, *Journal of the North American Benthological Society*, 19, 367-369,  
569 <https://doi.org/10.1899/0887-3593-19.3.367>, 2000.
- 570 Hawkins, C. P., Norris, R. H., Gerritsen, J., Hughes, R. M., Jackson, S. K., Johnson, R. K., and Stevenson, R. J.:  
571 Evaluation of the use of landscape classifications for the prediction of freshwater biota: synthesis and  
572 recommendations, *Journal of the North American Benthological Society*, 19, 541-556,  
573 <https://doi.org/10.2307/1468113> 2000.
- 574 Herr, A., Dambacher, J. M., Pinkard, E., Glen, M., Mohammed, C., and Wardlaw, T.: The uncertain impact of  
575 climate change on forest ecosystems How qualitative modelling can guide future research for quantitative model  
576 development, *Environ. Model. Software*, 76, 95-107, <https://doi.org/10.1016/j.envsoft.2015.10.023>, 2016.
- 577 Herr, A., Brandon, C., Beringen, H., Merrin, L. E., Post, D. A., Mitchell, P. J., Crosbie, R., Aryal, S. K.,  
578 Janarhanan, S., Schmidt, R. K., and Henderson, B. L.: Assessing impacts of coal resource development on water  
579 resources in the Namoi subregion: key findings. Product 5: Outcome synthesis for the Namoi subregion from the  
580 Northern Inland Catchments Bioregional Assessment,  
581 <http://data.bioregionalassessments.gov.au/product/NIC/NAM/5>, 2018a.
- 582 Herr, A., Aryal, S. K., Brandon, C., Crawford, D., Crosbie, R., Davies, P., Dunne, R., Gonzalez, D., Hayes, K. R.,  
583 Henderson, B. L., Hosack, G., Ickowicz, A., Janarhanan, S., Marvanek, S., Mitchell, P. J., Merrin, L. E., Herron,  
584 N. F., O'Grady, A. P., and Post, D. A.: Impact and risk analysis for the Namoi subregion. Product 3-4 for the  
585 Namoi subregion from the Northern Inland Catchments Bioregional Assessment,  
586 <https://www.bioregionalassessments.gov.au/assessments/3-4-impact-and-risk-analysis-namoi-subregion>, 2018b.
- 587 Hobbs, R. J. and McIntyre, S.: Categorizing Australian landscapes as an aid to assessing the generality of  
588 landscape management guidelines, *Global Ecology and Biogeography*, 14, 1-15, <https://doi.org/10.1111/j.1466-822X.2004.00130.x>, 2005.
- 590 Holland, K., Beringen, H., Brandon, C., Crosbie, R., Davies, P., Gonzalez, D., Henderson, B., Janardhanan, S.,  
591 Lewis, S., Merrin, L., Mitchell, P., Mount, R., O'Grady, A., Peeters, L., Post, D., Schmidt, R., Sudholz, C., and  
592 Turnadge, C.: Impact and risk analysis for the Maranoa-Balonne-Condamine subregion. Product 3-4 for the  
593 Maranoa-Balonne-Condamine subregion from the Northern Inland Catchments Bioregional Assessment,  
594 Department of the Environment and Energy, Bureau of Meteorology, CSIRO and Geoscience Australia, Australia,  
595 <http://data.bioregionalassessments.gov.au/product/NIC/MBC/3-4>, 2017.
- 596 Hosack, G., Ickowicz, A., Hayes, K. R., Dambacher, J. M., Barry, S. A., and Henderson, B. L.: Receptor impact  
597 modelling. Submethodology M08 from the Bioregional Assessment Technical Programme,  
598 <http://data.bioregionalassessments.gov.au/submethodology/M08>, 2018.

This page contains no comments





- 599 Hosack, G. R., Hayes, K. R., and Barry, S. C.: Prior elicitation for Bayesian generalised linear models with  
600 application to risk control option assessment, *Reliab. Eng. Syst. Saf.*, 167, 351-361,  
601 <https://doi.org/10.1016/j.res.2017.06.011>, 2017.
- 602 Ickowicz, A., Hosack, G., Mitchell, P. J., Dambacher, J. M., Hayes, K. R., O'Grady, A. P., Henderson, B. L., and  
603 Herron, N. F.: Receptor impact modelling for the Namoi subregion. Product 2.7 for the Namoi subregion from  
604 the Northern Inland Catchments Bioregional Assessment,  
605 <http://data.bioregionalassessments.gov.au/product/NIC/NAM/2.7>, 2018.
- 606 Jones, C. E. J., Leibowitz, S. G., Sawicz, K. A., Comeleo, R. L., Stratton, L. E., Morefield, P. E., and Weaver, C.  
607 P.: Using hydrologic landscape classification and climatic time series to assess hydrologic vulnerability of the  
608 western U.S. to climate, *Hydrol. Earth Syst. Sci.*, 25, 3179-3206, <https://doi.org/10.5194/hess-25-3179-2021>,  
609 2021.
- 610 Kilroy, G., Ryan, J., Coxon, C., and Daly, D.: A Framework for the Assessment of Groundwater – Dependent  
611 Terrestrial Ecosystems under the WaterFramework Directive, [http://erc.epa.ie/safer/resource?id=b5799c70-224b-  
612 102c-b381-901ddd016b14](http://erc.epa.ie/safer/resource?id=b5799c70-224b-102c-b381-901ddd016b14), 2008.
- 613 Leathwick, J. R., Overton, J. M., and McLeod, M.: An Environmental Domain Classification of New Zealand and  
614 Its Use as a Tool for Biodiversity Management, *Conservation Biology*, 17, 1612-1623,  
615 <http://dx.doi.org/10.1111/j.1523-1739.2003.00469.x>, 2003.
- 616 Leibowitz, S. G., Comeleo, R. L., Wigington Jr, P. J., Weaver, C. P., Morefield, P. E., Sproles, E. A., and Ebersole,  
617 J. L.: Hydrologic landscape classification evaluates streamflow vulnerability to climate change in Oregon, USA,  
618 *Hydrol. Earth Syst. Sci.*, 18, 3367-3392, <http://10.5194/hess-18-3367-2014>, 2014.
- 619 Lewis, S., Evans, T., Pavey, C., Holland, K., Henderson, B., Kilgour, P., Dehelean, A., Karim, F., Viney, N., Post,  
620 D., Schmidt, R., Sudholz, C., Brandon, C., Zhang, Y., Lymburner, L., Dunn, B., Mount, R., Gonzalez, D., Peeters,  
621 L., O'Grady, A., Dunne, R., Ickowicz, A., Hosack, G., Hayes, K., Dambacher, J., and Barry, S.: Impact and risk  
622 analysis for the Galilee subregion. Product 3-4 for the Galilee subregion from the Lake Eyre Basin Bioregional  
623 Assessment., Department of the Environment and Energy, Bureau of Meteorology, CSIRO and Geoscience  
624 Australia, Australia, 348, [https://www.bioregionalassessments.gov.au/assessments/3-4-impact-and-risk-analysis-  
625 galilee-subregion](https://www.bioregionalassessments.gov.au/assessments/3-4-impact-and-risk-analysis-galilee-subregion), 2018.
- 626 Liermann, C. A. R., Olden, J. D., Beechie, T. J., Kennard, M. J., Skidmore, P. B., Konrad, C. P., and Imaki, H.:  
627 Hydrogeomorphic Classification of Washington State Rivers to Support Emerging Environmental Flow  
628 Management Strategies, *River Research and Applications*, 28, 1340-1358, <http://doi.org/10.1002/rra.1541>, 2012.
- 629 MacMillan, R., Martin, T., Earle, T., and McNabb, D.: Automated analysis and classification of landforms using  
630 high-resolution digital elevation data: applications and issues, *Canadian Journal of Remote Sensing*, 29, 592-606,  
631 <https://doi.org/10.5589/m03-031>, 2003.
- 632 McMahon, G., Gregonis, S. M., Waltman, S. W., Omernik, J. M., Thorson, T. D., Freeouf, J. A., Rorick, A. H.,  
633 and Keys, J. E.: Developing a spatial framework of common ecological regions for the conterminous United  
634 States, *Environmental Management*, 28, 293-316, <http://doi.org/10.1007/s0026702429> 2001.
- 635 NSW Office of Environment and Heritage: Namoi Valley Flood Plain Atlas 1979, Bioregional Assessment Source  
636 Dataset [dataset], <http://data.bioregionalassessments.gov.au/dataset/a854a25c-8820-455c-946e-8bd39ca8b9d6>,  
637 1979.
- 638 NSW Office of Environment and Heritage: Border Rivers Gwydir / Namoi Regional Native Vegetation Map  
639 Version 2.0 VIS\_ID\_2004 [dataset], [http://data.bioregionalassessments.gov.au/dataset/b3ca03dc-ed6e-4fdd-  
640 82ca-e9406a6ad74a](http://data.bioregionalassessments.gov.au/dataset/b3ca03dc-ed6e-4fdd-82ca-e9406a6ad74a), 2015.
- 641 NSW Office of Water: Namoi CMA Groundwater Dependent Ecosystems [dataset],  
642 <https://data.gov.au/data/dataset/a3e21ec4-ae53-4222-b06c-0dc2ad9838a8>, 2015.
- 643 NVIS Technological Working Group: Australian Vegetation Attribute Manual: National Vegetation Information  
644 System, Version 7.0, Canberra, [https://www.environment.gov.au/system/files/resources/292f10e2-8670-49b6-  
645 a72d-25e892a92360/files/australian-vegetation-attribute-manual-v70.pdf](https://www.environment.gov.au/system/files/resources/292f10e2-8670-49b6-a72d-25e892a92360/files/australian-vegetation-attribute-manual-v70.pdf), 2017.

This page contains no comments



- 646 Office of Groundwater Impact Assessment: Spring vents assessed for the Surat Underground Water Impact Report  
647 2012 [dataset], <http://data.bioregionalassessments.gov.au/dataset/6d2b59fc-e312-4c89-9f10-e1fb20a7a6d>,  
648 2015.
- 649 Olden, J. D., Kennard, M. J., and Pusey, B. J.: A framework for hydrologic classification with a review of  
650 methodologies and applications in ecohydrology, *Ecohydrology*, 5, 503-518, <http://dx.doi.org/10.1002/eco.251>,  
651 2012.
- 652 Pain, C., Gregory, L., Wilson, P., and McKenzie, N.: The physiographic regions of Australia – Explanatory notes  
653 2011, CSIRO, Canberra, <https://publications.csiro.au/rpr/download?pid=csiro:EP113843&dsid=DS4>, 2011.
- 654 Poff, N. L., Richter, B. D., Arthington, A. H., Bunn, S. E., Naiman, R. J., Kendy, E., Acreman, M., Apse, C.,  
655 Bledsoe, B. P., Freeman, M. C., Henriksen, J., Jacobson, R. B., Kennen, J. G., Merritt, D. M., O’Keeffe, J. H.,  
656 Olden, J. D., Rogers, K., Tharme, R. E., and Warner, A.: The ecological limits of hydrologic alteration (ELOHA):  
657 a new framework for developing regional environmental flow standards, *Freshwater Biology*, 55, 147-170,  
658 <https://doi.org/10.1111/j.1365-2427.2009.02204.x>, 2010.
- 659 Post, D. A., Crosbie, R. S., Viney, N. R., Peeters, L. J., Zhang, Y., Herron, N. F., Janardhanan, S., Wilkins, A.,  
660 Karim, F., Aryal, S. K., Pena-Arancibia, J., Lewis, S., Evans, T., Vaze, J., Chiew, F. H. S., Marvanek, S.,  
661 Henderson, B. L., Schmidt, B., and Herr, A.: Impacts of coal resource development in eastern Australia on  
662 groundwater and surface water, *Journal of Hydrology*, 591, <https://doi.org/10.1016/j.jhydrol.2020.125281>, 2020.
- 663 Poulter, B., Ciais, P., Hodson, E., Lischke, H., Maignan, F., Plummer, S., and Zimmermann, N. E.: Plant  
664 functional type mapping for earth system models, *Geosci. Model Dev.*, 4, 993-1010, <https://doi.org/10.5194/gmd-4-993-2011>, 2011.
- 666 Pyne, M. I., Carlisle, D. M., Konrad, C. P., and Stein, E. D.: Classification of California streams using combined  
667 deductive and inductive approaches: Setting the foundation for analysis of hydrologic alteration, *Ecohydrology*,  
668 10, <https://doi.org/10.1002/eco.1802>, 2017.
- 669 Queensland Department of Science, Information Technology, Innovation and the Arts: Queensland wetland data  
670 version 3 - wetland areas [dataset], <http://data.bioregionalassessments.gov.au/dataset/2a187a00-b01e-4097-9ca4-c9683e7f4786>, 2012.
- 672 Queensland Department of Science, Information Technology, Innovation and the Arts: Queensland groundwater  
673 dependent ecosystems [dataset], <http://data.bioregionalassessments.gov.au/dataset/10940dfa-d7ef-44fb-8ac2-15d75068ff8>, 2013.
- 675 Queensland Government, Queensland: Groundwater dependent ecosystem mapping background,  
676 <https://wetlandinfo.des.qld.gov.au/wetlands/facts-maps/gde-background/>, last access: 09 Sep 21, 2016.
- 677 Queensland Herbarium: Regional Ecosystem Description Database (REDD). Version 12 (March 2021), Brisbane,  
678 <https://www.qld.gov.au/environment/plants-animals/plants/ecosystems/descriptions/download>, 2021.
- 679 Queensland Herbarium, Department of Science, Information Technology, Innovation and the Arts: Queensland  
680 Groundwater Dependent Ecosystems and Shallowest Watertable Aquifer 20150714 [dataset],  
681 <http://data.bioregionalassessments.gov.au/dataset/3d36e3d4-b16b-43b3-b2eb-c1aea7ef9193>, 2015.
- 682 SA Department for Water: South Australian Wetlands – Groundwater Dependent Ecosystems (GDE)  
683 Classification [dataset], <http://data.bioregionalassessments.gov.au/dataset/fc35d75a-f12e-494b-a7d3-0f27e7159b05>, 2010.
- 685 Sattler, P. S. and Williams, R. D.: The conservation status of Queensland's bioregional ecosystems, Environmental  
686 Protection Agency, Brisbane 1999.
- 687 Sawicz, K. A., Kelleher, C., Wagener, T., Troch, P., Sivapalan, M., and Carrillo, G.: Characterizing hydrologic  
688 change through catchment classification, *Hydrol. Earth Syst. Sci.*, 18, 273-285, <https://doi.org/10.5194/hess-18-273-2014>, 2014.
- 689

This page contains no comments



690 Snelder, T. H., Cattaneo, F., Suren, A. M., and Biggs, B. J.: Is the River Environment Classification an improved  
691 landscape-scale classification of rivers?, *Journal of the North American Benthological Society*, 23, 580-598,  
692 [https://doi.org/10.1899/0887-3593\(2004\)023<0580:ITRECA>2.0.CO;2](https://doi.org/10.1899/0887-3593(2004)023<0580:ITRECA>2.0.CO;2), 2004.

693 Thackway, R. and Cresswell, I. D.: An Interim Biogeographic Regionalisation for Australia: A framework for  
694 setting priorities in the national reserves system cooperative program, Australian Nature Conservancy Agency,  
695 Canberra, 99, [https://www.environment.gov.au/system/files/resources/4263c26f-f2a7-4a07-9a29-  
696 b1a81ac85acc/files/ibra-framework-setting-priorities-nrs-cooperative-program.pdf](https://www.environment.gov.au/system/files/resources/4263c26f-f2a7-4a07-9a29-b1a81ac85acc/files/ibra-framework-setting-priorities-nrs-cooperative-program.pdf), 1995.

697 Welsh, W., Herron, N., Rohead-O'Brien, H., Ransley, T., Aryal, S., Mitchell, P., Buckerfield, S., and Marshall,  
698 S.: Context statement for the Maranoa-Balonne-Condamine subregion. Product 1.1 for the Maranoa-Balonne-  
699 Condamine from the Northern Inland Catchments Bioregional Assessment, Department of the Environment,  
700 Bureau of Meteorology, CSIRO and Geoscience Australia, Australia, <http://data.bioregionalassessments.gov.au/product/LNIC/MBC/1.1>, 2015.

702 Welsh, W., Hodgkinson, J., Strand, J., Northey, J., Aryal, S., O'Grady, A., Slatter, E., Herron, N., Pinetown, K.,  
703 Carey, H., Yates, G., Raisbeck-Brown, N., and Lewis, S.: Context statement for the Cooper subregion. Product  
704 1.1 for the Namoi subregion from the Northern Inland Catchments Bioregional Assessment. Department of the  
705 Environment, Bureau of Meteorology, Department of the Environment, Bureau of Meteorology, CSIRO and  
706 Geoscience Australia, Australia, <http://data.bioregionalassessments.gov.au/product/NIC/NAM/1.1>, 2014.

707 Wiens, J. A. and Milne, B. T.: Scaling of 'landscapes' in landscape ecology, or, landscape ecology from a beetle's  
708 perspective, *Landscape Ecology*, 3, 87-96, <https://doi.org/10.1007/BF00131172>, 1989.

709 Wolfe, J. D., Shook, K. R., Spence, C., and Whitfield, C. J.: A watershed classification approach that looks beyond  
710 hydrology: application to a semi-arid, agricultural region in Canada, *Hydrol. Earth Syst. Sci.*, 23, 3945-3967,  
711 <https://10.5194/hess-23-3945-2019>, 2019.

712 Zhang, Z., Zang, R., Wang, G., and Huang, X.: Classification of Landscape Types Based on Land Cover,  
713 Successional Stages and Plant Functional Groups in a Species-Rich Forest in Hainan Island, China, *Tropical  
714 Conservation Science*, 9, 135-152, <https://doi.org/10.1177/194008291600900107>, 2016.  
715

716

#### 717 **Author contributions**

718 AH, LM undertook the original draft preparation. All authors contributed to review & editing, conceptualisation,  
719 methodology, and investigation.

#### 720 **Competing interests**

721 The authors declare that they have no conflict of interest.

#### 722 **Acknowledgements**

723 This research was carried out under the auspices of the Bioregional Assessment Programme, a collaboration  
724 between the Department of Environment and Energy, CSIRO, Geoscience Australia and the Bureau of  
725 Meteorology.

This page contains no comments
